# Supplementary material for: Ground-penetrating radar imaging reveals glacier’s drainage network in 3D
Source: Copernicus journal article supplement (doi:10.5194/tc-2021-82), 2021-04-14
Supplement: Supplementary file [file tc-2021-82-AC2-supplement.pdf]

Dear Dr. Joseph MacGregor and Reviewers,

We appreciate all your positive and constructive feedback to our manuscript tc-2021-82 entitled "Ground-penetrating radar imaging reveals glacier's drainage network in 3D". On the following pages, we have provided a point-by-point response to your comments

If you have any further questions, we would happily answer them and we look forward to hearing back from you regarding your decision.

Best regards,  
Gregory Church and all co-authors

## Review 1

Comment on “Ground-penetrating radar imaging reveals glacier’s drainage network in 3D”  
12 May 2021

### Summary

The manuscript presents a 3D ground-penetrating radar (GPR) survey near the termini of Rhonegletscher, Switzerland. The goals of the study are to characterize the englacial/subglacial drainage system, as well as highlight the advantages of 3D GPR over glaciers, which this study is the first of its kind. Based on manual inspection of the radargrams an englacial drainage network is outlined with high resolution. The authors then use the amplitude of the picked network reflection, as well as the bed return to derive locations of englacial/subglacial water. The results are in agreement with two main theoretical frameworks - i) the englacial drainage network leads around an overdeepening rather than water flowing directly across it, and ii) the drainage conduit is likely flat and non-circular shaped.

**We are grateful for the reviewer’s positive and constructive feedback and appreciate the suggestions to help further improving our manuscript.**

### General minor comments

According to the authors-, and my knowledge, this is the first 3D GPR study over a glacier, resulting in detailed characterization of the Rhonegletscher’s englacial/subglacial hydrological drainage system. The methodologies and results are mostly well explained, and the manuscript is well structured, while the writing could be improved with some minor changes. I believe that the observations bring a valuable contribution to the glaciology and radioglaciology community and is well within the scope of The Cryosphere. However, I find that the main weak point of the manuscript is the lack of a discussion of possible implications of the findings for glacier dynamics and hydrology, especially as this is the motivation for studying such drainage networks (as outlined in the manuscripts introduction). Additionally, the manuscript could be improved in several aspects outlined below:

**Introduction:** The introduction provides a decent overview of the topic, stating the importance of a glaciers subglacial hydrological system for mass loss, and the difficulties/lack of observations using 2D GPR measurements. However, there are a few minor points that could be improved:

1) The differences between 2D and 3D GPR is not entirely clear and could be introduced in a bit more detail (i.e. both datasets are collected as line-by-line surveys, but with different survey setups/line spacing and processing techniques) – **We have added a sentence within the introduction stating how 3D GPR surveys are composed of densely spaced multiple 2D GPR profiles that are collectively processed in order to avoid both any sampling bias in the in-line direction and spatial aliasing in the cross-line direction.**

2) I think that the research goals could be formulated more clearly and more closely tied to the current knowledge gaps. For example, the manuscript mentions the study is motivated

by previous findings (Line 57). I therefore suggest including a brief overview of these previous observations regarding the glacier hydrology on the Rhonegletscher, and what aspects of these findings (i.e. unknown extent of drainage system, improved resolution?) motivated this study. A brief introduction to the current knowledge on the Rhonegletscher drainage system would also help the reader to better understand the results from this study. – **We have renamed ‘Survey Site’ to be ‘Survey Site and Previous Work’. We have moved and expanded on the previous GPR surveys conducted on Rhonegletscher as suggested.**

3) The introduction would greatly benefit from a brief overview of the theory of englacial drainage flow around overdeepenings, rather than simply mentioning it as a “long-standing glacier hydraulic theory (L45)”. – **We have added a paragraph before the aim of the study and stated how the overdeepening hypothesis from Lliboutry (1983) can have an impact on sliding velocities.**

**Methods:** The description of the methods is generally good, but I think the interpretation of the drainage network would benefit from a bit more detailed explanation on how the drainage network was picked (i.e. manual picking of visually strong, coherent reflections, added knowledge from previous GPR/seismic/boreholes data (Church et al., 2019, 2020)). I find it particularly difficult to follow how the drainage network was identified at the glacier bed. For example, on Figure 2c there is no obvious visual difference between the picked subglacial drainage network (dark blue arrows) and the ice-bed interface at profile locations 1850 and 1900. Additionally, in Section 4.3, the manuscript states that high basal reflectivity regions may also represent a subglacial water/drainage system, but these were not identified as drainage network in the manual picking. This leaves me wondering why these areas were not picked in the first place, and whether the identification of subglacial water should be done via interpreting bed amplitudes rather than visually identifying/picking a drainage network. – **We have updated the manuscript within section 3.2 with more details on how the drainage network was picked by visually following the strongest continuous reflection across the survey site. This was quality controlled using an amplitude map (RMS map) between the ice-bed interface and the glacier surface. In Figure 2c, the strong bed reflection identified at profile location 1850 and 1900 is not connected to the continuous reflection and therefore, these have not been interpreted along the main drainage network. The areas that were not picked in Section 4.3 were not part of the main drainage network (i.e., not showing similar characteristics to the drainage network – amplitude strength/continuity etc). We have updated Section 4.3 to state this.**

Additionally, Church et al., (2020) note the importance of calibrating reflectivities using borehole data. Was this attempted in this study? Or could it be done via comparing the 3D grid from this study to the previous GPR data? – **This was not attempted during this study as reflectivities were not calculated and instead only the reflected GPR amplitudes were plotted after amplitude correction (geometrical spreading and attenuation). In order to calibrate using the borehole information the amplitudes could be convert to reflectivities using the methodology described in Church et al (2020). However, this was beyond the scope of this project and could be a natural extension of this work.**

**Results:** In general, the results are well described, however, there are two main points that could improve the manuscript:

1) Rather than stating that water is pooling where the bed is flat, it should be stated in terms of subglacial hydraulic flatness. I suggest calculating the subglacial hydraulic head/gradient, and determine whether the areas of high basal reflectivity occur in local hydraulic minima (which would allow pooling). Additionally, I wonder whether the high bed reflectivities could be caused by saturated sediments (or clay, see (Tulaczyk & Foley, 2020)) rather than ponded water. – **We have added 4 different hydraulic potential scenarios figures in the supplement reflecting the diurnal nature of the subglacial water pressure of Rhonegletscher (25%, 50%, 75% and 95% water pressure). Furthermore, during the discussion we have added that high bed reflectivities may result from either water accumulations along a hard bed or saturated sediments. However, the latter is unlikely due to outcrops showing a granite bedrock with little sediment and also borehole camera images from 2018 within the survey indicating a hard granite basal-interface.**

2) The comparison of the 2D vs. 3D processing is based on a single profile. Because there is so much data available, I think the argument for 3D processing would be stronger if more data is shown (i.e. more profiles in a supplement, and/or statistics showing the difference between bed/englacial reflections identified in the 2D vs. 3D data). I also think that there would be an opportunity to compare results from this study's 3D data to the (already picked) 2D data in Church et al., (2020). Considering the manuscripts goal "to demonstrate the feasibility and opportunities of 3D GPR", I think that a more sophisticated comparison between 2D and 3D data would better highlight the advantages of 3D GPR. – **We have added a supplement of 3 additional 2D v. 3D GPR comparisons. We conclude that the imaging is similar in terms of basal reflectivity and englacial reflectivity between 3D and 2D however, the real impact is when observing multiple 2D lines (making a pseudo-2.5D survey) and the 3D cube. In such a case there is a visible difference (see discussion part 3 below for the comparison between multiple 2D lines and 3D imaging).**

**Discussion:** Overall, the discussion is well structured, however, is a bit vague regarding some findings:

1) I think the manuscript would benefit from a more detailed discussion on the configurations of the drainage system and its implications for glacier hydraulics, possible seasonal evolution and ice dynamics. For example, the results show a channelized water system upstream, and a more dispersed system downstream. What causes this and what are the implications for ice dynamics? What are the implications of the englacial drainage network connecting to the basal drainage network and vice versa? And what implications could be derived from the study's results regarding future glacier retreat and the formation of the proglacial lake? – **Regarding glacier hydraulics and glacier ice dynamics we have addressed this in point 2 point below. In terms of seasonal evolution without having repeated surveys throughout the year any such statements regarding the subglacial drainage network are speculative and difficult to make. We know from previous measurements (Church et al. 2020) that the main network does not completely shut during winter however, we do not have continuous surface ice flow velocities to tie with our study and this would also be a nature extension to combine more data.**

2) The results appear to agree with the theory of non-circular channel shapes, however, there is no discussion about the implications of this agreement. What does this mean for the water pressure, channel evolution, ice dynamics? – **We have updated section 5.2 stating that in theory Hooke-channels lead to increased hydraulic friction and thus higher water pressure than semi-circular R-channels. This is due to not only the shape itself but also due to higher closure rates. Thus, the impact on ice dynamics is then that such a configuration would support higher sliding speeds. Furthermore, we now refer to Werder et al 2010 who fitted a Hooke-channel to tracer measurements and found that the hydraulic friction could be well explained by assuming low and broad channels (i.e., Hooke channels).**

3) Finally, the manuscript would benefit from a discussion of the findings with respect to previous observations on the Rhonegletscher. For example, does the 3D data agree with the previous 2D survey in the upstream part? What knowledge is gained from the 3D survey compared to the 2D survey from Church et al. (2020)? – **We have included an additional figure of the drainage network derived (added to supplement) from the 2D GPR data presented in Church et al. 2020 and compared it to the 3D GPR drainage network. The 3D GPR data processing has improved the lateral resolution of the drainage network. We have updated the discussion section (5.3) on the future of 3D GPR within glaciology to discuss this uplift in lateral resolution and thereby advocating future 3D GPR surveys.**

**Figures/Movies:** Most figures are very well prepared and are easy to read/understand. I also highly appreciate the movies which helped to understand the results. I have a few small suggestions for the figures:

Figure 2b: Maybe I am seeing this wrong, but it looks like the bed contour lines are different than in the following figures. It appears that the overdeepening minima is west of profile line C, whereas in the following figures the overdeepening minima is east of profile line C. – **I assume you mean Fig. 1b – if so, this is correct. The contour lines in Fig 1b are from the GlaTe modelling and are not picked on using a 3D GPR processing dataset. The GlaTe model is an ice-thickness model that combines ice dynamics and GPR data to approximate ice-thickness. The caption has been updated to reflect this in Fig 1. The bed elevation in Fig 4 onwards appear only within the survey area. We have updated caption 4 and 5 to indicate that the basal elevation is from the 3D GPR data.**

Figure 4a: The dark blue outline in conduit region C is difficult to see, I suggest using a different color. – **We have updated the outline of the subglacial network zone to be a red colour.**

Figure 5: I wonder if it would be beneficial to mark the hydraulic head contour lines instead of the bed contour lines. Additionally, it might be useful to mark the outline of the picked drainage network to highlight the difference in englacial/subglacial water pathways. – **See note above regarding adding figures within the supplement showing hydraulic potential.**

Line-by-line minor comments:

L33-34: “2D data sets are typically unable to image complex subsurface structures, ...” I’m not sure if it is the complexity of subsurface structures that is difficult to image with 2D radar datasets, or rather the size/scale of subsurface structures relative to the radar surveys. – **We**

believe that both the complexity of the subsurface (i.e., reflections from out of the 2D plane) and size/scale of subsurface structure would cause imaging issues. However, out-of-plane reflections would result in mis-positioning of reflection data within the plane and this can only be solved with 3D. For this reason, we have retained the original wording but have updated the manuscript to state both the complexity and scale of subsurface structures relative to the radar surveys make imaging difficult with 2D GPR data.

L36: Suggest replacing “option” with “tool” – **Changed as requested**

L39: “..., because 3D GPR provides subsurface images that can be viewed from arbitrary directions,...” I agree that being able to view/visually inspect subsurface images in 3D provides an advantage, but results from 2D survey grids could be interpolated to generate (lower resolution) 3D images as well. I believe that the main advantage, and thus the argument for 3D surveys (or simply closely-spaced survey grids) is the high data coverage allowing to image the target at high spatial resolution. The “high resolution” is also noted as the motivating factor on Line 46. I suggest adding the high-resolution aspect to this sentence. – **We have added a new sentence stating that 3D GPR can provide high spatial resolution imaging of glacier drainage networks.**

L43-46: I think this paragraph would benefit from some re-structuring. It is not clear whether the 3D GPR survey was performed to demonstrate the feasibility of such surveys, to further characterize the drainage network previously identified in (Church et al., 2019, 2020), or to investigate the hypothesis that englacial drainage flows around overdeepenings (or all of the above). – **Done (all of the above), we have re-structured the sentence to have three list items stating that these are all the objectives.**

L45: “... to confirm long-standing glacier hydraulic theory.” I think confirm is a strong word, and I am not sure if a theory can be confirmed with just one observation. I suggest changing this to “our hydrological observations are in agreement with a long-standing glacier hydraulic theory”. Additionally, I think it would be helpful to spell out what the theory is. – **Done, rephrased confirm to determine whether the observations are in agreement with long-standing theory.**

L49: Replace ‘It is representative...’ with “The Rhonegletscher is representative...” – **Done**

L70-71: “The 3D GPR data were collected ...” I’m a bit hesitant to call this 3D GPR data, as the data was collected along 2D profile lines, just with close line spacing. Maybe this could be specified by something along “The GPR data for our 3D processing flow were collected in dense (2m spaced) survey lines perpendicular to the ice flow direction.” – **Agreed, and modified text**

L93: “performed using an EM wave propagation velocity” (insert an) - **Modified**

L93: I suggest replacing “stretched” with “converted” - **Modified**

L95: I am not familiar with Q compensation for attenuation, but is it possible to state the attenuation rates used in the study (typically expressed as dB/km)? And what are the

uncertainties from this attenuation correction? – **More information on the attenuation correction has been addressed with reviewer 2 comments. For more details on the attenuation correction see Irving and Knight (2003).**

L99: “..., the drainage network was picked ...”, it is unclear on what basis the drainage network was identified, i.e. manual picking of visually strong, coherent reflections, added knowledge from previous GPR/seismic/boreholes data (Church et al., 2019, 2020)? – **The drainage network was identified as the strongest continuous coherent reflection across the survey site and manually picked with aid from previous GPR, seismic and borehole studies. The section in the manuscript has been updated to reflect these changes.**

L121-123: The sentences are a bit longwinded and repetitive. Also, rather than just stating that the drainage network was identified from the GPR data, I suggest clarifying based on which GPR attributes the network was interpreted from (i.e. based on the high amplitudes, manual inspection, the spatial pattern, the agreement with previous observations, see comment above). Additionally, how are the low amplitudes towards the edges and southern part of the outlined drainage network interpreted? Are these areas of past water flow, channel filled with air/sediments? – **Alongside the comment above we have updated the processing section to include how the drainage network was identified and picked. This has been reflected in the revised manuscript. Furthermore, areas on the edges of the survey are not fully imaged and caution was used in these areas and there exist amplitude uncertainties within these areas.**

L123: “red” should be “yellow” - **Replaced**

L125&L126: replace “overdeepen” with “overdeepening” – **Agree and replaced.**

L126: “flowing alongside”, a conduit doesn’t really flow itself, replace with “follows” or “runs” – **Corrected as suggested**

L128/130/134: “flows into a subglacial drainage system” / “flows into another englacial conduit”, same as above, I suggest changing this to “connects with”, or “transitions to ...”. – **Updated manuscript to reflect these changes.**

L132: replace “the conduit is expected to flow” with “water in the conduit is expected to flow” – **Updated manuscript with this change.**

L145: add “local basal hydrological conditions” to be more specific. – **Updated manuscript to state that the amplitude provides insights into the bedrock type and whether subglacial water is present.**

L145-147: “... thereby indicating this area is positioned along the main drainage network identified in Figure 4.”. The message of this sentence is not clear. What does “along the main drainage network” mean? I assume the argument is that the high reflectivities suggest the presence of water at the glacier bed, with the upstream and downstream boundaries of this area spatially coinciding with the location of the englacial drainage network identified in

Figure 4. – **We have reworded this to state – thereby indicating this area is identical to the drainage network identified in Fig4a.**

L148: Delete s in “amplitudes” - **Done**

L154: Delete “today’s” - **Done**

L155: In my opinion, 2D surveys can provide 3D subsurface images via interpolation, but the distinct advantage of 3D surveys is the image resolution. I suggest changing to “unable to provide high resolution 3D subsurface images, ...” – **Updated sentence as requested.**

L157-161: I think “ambiguities” or “off-nadir reflections” would be a better description than “distortions”. – **Retained distortions however, have added that the ray path in Figure 6 results in distortions caused by off-nadir reflections.**

L158: Figure 6 refers to an example geometry that can lead to off-nadir reflections in 2D GPR surveys, but it does not show the “distortion”/ambiguity itself. – **We have altered the caption to state the example shows an off-nadir reflection raypath that would lead to distortions in 2D GPR processing.**

L163: Delete “improved” - **Deleted**

L167: I suggest changing “more unambiguous” to “less ambiguous” – **Changed as suggested**

L174: “In our case, it has a meandering nature ...” I suggest changing this sentence to: “The Rhonegletscher drainage network identified in this study has a meandering nature throughout the survey area, with an increasing network width towards the glacier terminus.” – **Updated as suggested**

L182-183: “The 3D GPR imaging results...” this sentence is a repetition from above (L175), I suggest merging them. – **These sentences are now combined in order to avoid repetition.**

L185: I think it would be great to include a bit more detail on how exactly the Rhonegletscher results are in agreement with Hooke et al. (1990). – **We have added to the manuscript that Hooke used water pressure data from Storglaciären to establish a theory that subglacial channels are broad and low and therefore, are in agreement to our observations on Rhonegletscher.**

L194-197: There is no figure in the results section that shows the hydraulic potential/gradient. I suggest adding hydraulic potential contour lines to one of the maps (e.g. on Figure 5a, replacing bed elevation contours). This would also take care of the argument about high reflectivity in areas where water has the potential to pool. Alternatively, I suggest adding a figure to show the hydraulic head/gradient (possibly as supplement). – **We have added supplement figures of the hydraulic head. In order to calculate the hydraulic potential, the subglacial water pressure is required. We have generated several hydraulic potential plots with subglacial water pressure varying between 25% and 95% of the overburden ice thickness (in agreement with the diurnal fluctuations observed in Sugiyama 2007). The**



**overall conclusion that the isolated high amplitude spots lie in places where the hydraulic potential is constant.**

L202: “This is in contrast to our 3D GPR data set,...” I suggest removing or re-wording this sentence, as the GPR dataset in the study is not over a subglacial lake, but the sentence refers to the delineation of subglacial lake outlines. – **We have reworded this sentence to state “With the user of our 3D GPR data set, we are able to delineate high-resolution changes to the basal interface”.**

L207-210: Here, the water accumulations are interpreted as isolated cavities, but in the results section (L150), it is noted that in the southern area there is likely a connected water system. If there is a different interpretation of the hydraulic system in the north and south, this should be stated more clearly. – **This is corrected. In the results section we originally stated that in the southern part, high amplitude patches are connected. We have modified to state partially connected.**

L218: Not clear what is meant by “rate of acquisition”. Time-consuming dense survey grids required for 3D surveys? – **Indeed, in order to avoid confusion with future readers we have updated the manuscript to state the major limiting factors are the time-consuming nature of the ground-based GPR data acquisition.**

L218: I am not sure if the “accessibility” of the field site is more difficult for 3D surveys than 2D surveys. When conducting a 2D profile across an ice cap/glacier, I would expect the glacier to be similarly accessible a few meters upstream/downstream of this profile line (with the exception of heavily crevassed areas). I think another argument for UAVs would be safety (i.e. less time spent on the glacier, no need to cross crevasses etc.). – **In terms of accessibility, the presented 3D GPR survey could have been extended in the west section. However, due to heavily crevassed areas (accessibility issues) this was not possible. We have updated the manuscript to state both the accessibility issues in terms of crevassed areas and also safety.**

L227: “... confirming long-standing...”, in my opinion, confirming is a strong word here (see comment above). – **We have reworded accordingly.**

L233-234: “... which is in contrast to theory. However, these observations are in line with further conduit geometry developments...”. This is a bit vague, I suggest clarifying and spelling out that the results agree with the theory of broad and low shaped channels rather than circular channels. – **Updated manuscript to reflect that the theory states channels are circular.**

L235: delete “as” – **Deleted.**

Reviewer 2

Review of "Ground-penetrating radar imaging reveals glacier's drainage network in 3D" by Gregory Church et al., May 2021

General Comments:

This paper presents the results of a high-resolution, 3D ground-penetrating radar (GPR) experiment conducted near the terminus of the Rhonegletscher in Switzerland. Approximately ~85 line km of GPR data were acquired with 25-MHz antennas along a series of parallel survey lines oriented perpendicular to glacier flow. A dense (2-m) line spacing was used in order to avoid spatial aliasing of reflection events in the cross-line direction. By examining the spatial distribution of reflection amplitudes in the processed 3D GPR data cube, the authors are able to clearly identify and map major englacial and subglacial channels, which allows them to importantly confirm that englacial conduits tend to flow around glacial overdeepenings rather than directly over them. Further, they identify a number of other high-amplitude zones near the glacier bed that may represent accumulations of subglacial water.

Overall, I found this paper to be of excellent quality and think that it represents a very interesting contribution to the existing literature. The amount of work to acquire these data (on foot!) is impressive, and the results strongly encourage the continued use of dense 3D GPR acquisitions in glacier hydrological studies. My suggested revisions (see below) are rather minor and mainly focus along the following three themes:

**We are grateful for the reviewer's positive and constructive feedback and appreciate the suggestions to help further improving our manuscript.**

1) The authors should further acknowledge previous work involving dense 3D GPR acquisitions on glaciers and avoid statements suggesting that this is the first study of this kind. The study is excellent and the findings are extremely interesting, but it is not the first time that people have considered these kinds of data, even within the context of glacier hydrology. – **A new paragraph has been added to the introduction reviewing the other 3D GPR data used to investigate the drainage network (namely, Harper et al and Egli et al) and we have removed statements indicating that this is the first study doing this (from what we can find, this is the first 3D GPR for englacial drainage network).**

2) The authors should reduce the conclusive nature of a number of statements in the manuscript concerning channel widths and heights, data resolution, and the presence of subglacial water. For me, many of these findings are not absolute and the corresponding uncertainty should be clearly expressed in the interpretation. **We have updated the conclusive nature of our statements to include uncertainty. For the lateral dimensions we have used the post-migration horizontal resolution as uncertainties and for the conduit thickness, the uncertainties stem from a GPR modelling exercise taken directly from Church et al. 2020 that investigate thin layer effects on the reflectivities.**

3) A more in-depth discussion of some aspects of the GPR data processing, as well as on resolution, should be provided. – **We have altered the part about the regularisation and**

**provided some more detailed feedback in the line-by-line comments (including updates to the lateral resolution).**

Specific comments:

Line 6: Please delete "for the first time" and "unprecedented" from this sentence in the abstract. As much as the results presented in this paper are truly excellent and impressive, the wording suggests that such data have never been acquired before. Harper et al. (2010) use high-resolution, unaliased 3D GPR data to identify basal crevasses forming part of the subglacial drainage system of Bench Glacier, Alaska. More recently, Egli et al. (2021) identify the subglacial channel network on two Swiss glaciers from unaliased 3D GPR surveys. Hansen et al. (2020) also use 3D GPR to map the englacial and subglacial drainage system in a High-Arctic glacier, albeit in this latter case the survey lines were spaced quite far apart. – **As suggested, we have removed this wording as we are not completing this for the first time. It is noted that Harper et al., used their 3D GPR for basal crevassing which didn't providing imaging of a conduit-based drainage network however, the recent Egli et al. manuscript had similar observations to ours.**

Lines 27-46: The introduction of the paper is quite good, but very short, and for me what is missing is a summary and acknowledgement of work where people have used similarly unaliased 3D GPR surveys to investigate glaciers. Papers to be mentioned specifically in this context include Harper et al. (2010), Murray and Booth (2010), Reinardy et al. (2019), and Egli et al. (2021). Of these, Harper et al. (2010) and Egli et al. (2021) specifically investigate the glacier drainage system. – **Done, in agreement with reviewer 1; we have updated the introduction to include a more comprehensive review of 3D GPR literature, 2D v. 3D GPR, overview of research goals and overview of englacial drainage flow around overdeepenings.**

Line 89, "Such a processing step...": This sentence is confusing. What do you mean by an amplitude imprint? – **Regularisation is the processing stage used for 3D geophysical processing – typically done in large scale seismic processing for offshore hydrocarbon exploration and this has been applied in this GPR processing workflow. Regularisation is the process of moving the geophysical data to centre of their respective bins. Migration results improve when the GPR data has uniform spacing (i.e., constant 0.5 m in inline and 2 m spacing in crossline). The regularisation can be done using anti-leakage Fourier Transforms as described here: <https://doi.org/10.1190/1.3507248> – fundamentally, it's an interpolation of the GPR data to its bin centre. If the bin centre interpolation was done without removing overfold within the bins an amplitude imprint of overfold could be observed. We have modified this section of the manuscript to explain it clearer.**

Line 90: Please provide details on how exactly the data were "interpolated and regularized". What do you mean by regularization? – **See above – I have removed the term regularisation to avoid confusion and replaced with interpolation of GPR data within their own bin.**

Line 93: Please provide some further details on the Kirchhoff migration procedure. How did you choose the constant velocity of 0.167 m/ns, which corresponds to ice with essentially zero water content? And what aperture was used for the migration? I assume that no

corrections for the radiation pattern of the antennas were included (?) Did you account for the effects of the glacier surface topography?

**We have updated the manuscript to reflect the additional processing information outlined below:**

- **Velocity; we used 0.167 m/ns based upon previous studies on temperate glaciers (Langhammer et al 2019). In Church et al 2020, CMP's were acquired to determine velocities and were found to be between 0.165 and 0.17 m/ns.**
- **Migrations were limited based upon dip rather than aperture. A dip limit of 50 degrees was used. This aided in the reduction of noise in the final image. Tests were conducted from 30 degrees to 80 degrees.**
- **No correction for radiation pattern was performed. Amplitude corrections were uniform (i.e., no directionality correction) using a geometrical spreading and attenuation correction.**
- **Topographic correction was applied post-migration.**

Line 95: More details on the Q compensation are needed. How significant was the dispersion in the data and why? – **The attenuation correction was an amplitude-only correction. The dominant (amplitude) loss is through dielectric attenuation and therefore, Q-based attenuation correction was applied in order to correct for this loss.**

Line 95: The data were already once bandpass filtered. Now, after migration, you mention that they were bandpass filtered again. Please explain why exactly this second filtering is necessary. – **The amplitude Q compensation artificially boosted high frequencies that were noise and therefore, this noise was suppressed using the second bandpass filter. The reasoning has been added to the manuscript.**

Line 100, "The spatial extent...": This step is not at all clear and needs further details and explanation. – **We have re-worded the section to state; In order to ensure the picked drainage network encompassed the entire observable drainage network in the GPR survey area, GPR elevation slices were investigated in order to locate strong englacial and subglacial reflections that could represent a water-filled drainage network.**

Line 110: You mention that a weak ice-bed reflection indicates that subglacial water is not present, but there could be other explanations. For example, the bed reflection may change amplitude as a result of variable success of the migration of the data. That is, assumptions in the migration (e.g., constant velocity no radiation patterns) along with the biased nature of the sampling (0.5 m in-line; 2 m cross-line) may cause amplitude artifacts along the bed. Also, I would think that, at a frequency of 25 MHz, you would need quite a thick layer of water at the bed to be seen (i.e., water may still be there, but in a thinner layer). – **Agreed that the bed reflection may result of variable success of migration however, the migration velocity was tested (and alongside CMP's) and results within  $\pm 5\%$  were similar. It would be expected that directional radiation patterns would provide amplitude imprints on strongly dipping reflectors due to the angle of incidence being away from 0 degrees. However, the glacier flank (strongest dipping event) GPR reflection produced a strong continuous reflector and thereby indicating that the radiation pattern is minimal on the reflected data. The largest amplitude differentiator would come from the actual subglacial/englacial material causing the reflection. In terms of thickness of water layer an often quote minimum thickness is**

**1/30<sup>th</sup> wavelength (Sheriff et al.) and in the case of GPR wavelength in water this would equate to ~4 cm (wavelength at 25 MHz = 1.333 m). We find it difficult to believe that a thin water layer exists that is undetectable.**

Line 122, "The entire drainage network was identified from the GPR data": I think this sentence needs to be revised to reflect the fact that only the parts of the drainage network within the resolution limits of the GPR data were identified. There may be many more smaller englacial and subglacial conduits that were simply not detected with the 25-MHz data because of its rather low resolution. – **We have updated the manuscript to state that “the entire detectable drainage network...”**

Line 123, "red in Fig. 4a": There is no red in Figure 4a. – **Changed to yellow; a late change of the colour map was done and this red to yellow was missed. Thank-you for bringing this to our attention.**

Figure 4: Regions A,B,C,D should be labeled on both subplots (a) and (b). – **We have added letters A-D on Figure 4a.**

Also, it's not very clear how the amplitude plot in (a) was obtained. As I understand it, you extracted the outline of the glacier drainage network based on high reflection amplitudes observed in the data (blue lines in Figure 3). Then you went along this identified drainage network and calculated the RMS amplitude in a 2-m window centered around the drainage network (?) If this is the case, then why do we see only a thin yellow zone with high reflection amplitudes in (a)? Wasn't this entire drainage network region chosen because of high amplitudes in the data? – **You are correct, the main drainage network was identified in the GPR data and picked based upon it being high amplitude and a specular and continuous reflection. The reasoning why we only have a dominant yellow zone could be due to two reasons: 1. The dominant yellow amplitude in Fig 4a represents the centre of the channel and the location where melt water is flowing within the conduit. Whereas the blue areas (lower amplitude) surrounding this main channel are areas where the GPR returns a continuous reflection (albeit smaller amplitude than the main channel but higher than the surrounding noise). This could be the result of water infiltrating the ice near the conduit's walls (i.e., water saturated ice). The width of the channel has been derived from the yellow section of Fig 4 and therefore, our conclusion that the channel is thin and wide remains 2. A result of the horizontal resolution of the 25 MHz GPR data.**

You also mention that the high-amplitude (yellow) regions here correspond to water, but how do you know? Couldn't they correspond to air in the channel? – **We are displaying RMS amplitude in Figure 4a however, the polarity of the reflected GPR wavelet was identical to the bed reflection. In the case of air being in the conduit we would expect the opposite polarity from the bed; this was checked across the entire survey site to ensure that a polarity flip is not observed and therefore, we can rule out the reflection being caused by the presence of air.**

Finally, the RMS amplitudes in the south are very low (near zero), suggesting that a conduit is not present. What is happening there? – **We can speculate that further down-glacier the conduit is becoming somewhat diffusive and is no longer a single main branch. However,**

**hard conclusions are difficult to draw. This observation (D) has been updated in the text to state it encounters a diffusive network of englacial conduits towards to the terminus.**

Line 130: Observation "D" is not clear for me from Figure 4. – **We have added more information, while addressing the previous comment.**

Lines 132-142: This paragraph attempts to use the GPR results in Figure 4a to assess the width and height of the identified channels, but for me the statements are far too conclusive given the resolution limitations and uncertainties in the data, and require some important assumptions. For example, in your assessment of the channel height, you appear to make use of the 1/4 wavelength vertical resolution criterion, which at 25 MHz and for water (velocity = 0.033 m/ns) is around 0.33 m. But this assumes that the channel is water-filled, which may not be the case. As the identified channels are extremely large, couldn't they be at least partly filled with air? In the case of an air-filled channel, the 1/4 wavelength value increases to 3 m meaning the channel height could be much greater. With regard to horizontal resolution, the GPR wavelength in ice will also have some effect. In perfectly migrated data, for example, the limit to horizontal resolution (if I remember correctly) is 1/2 wavelength, which for ice and 25 MHz is 0.84 m. But practically the value will be greater than this because of the limited migration aperture, lack of taking into account antenna radiation patterns, constant velocity assumption, etc. In short, I think some detailed discussion on resolution is needed in the manuscript, and statements should be written to reflect the substantial uncertainty as a result of limits to resolution. – **We have updated the manuscript regarding the uncertainties in the horizontal direction based upon the horizontal resolution (wavelength in ice / 4 = 1.67 m). Furthermore, we have also discussed the assumption that the conduit is water-filled and therefore is at the limit of the vertical resolution. Should the conduit be air-filled the amplitude will be opposite to the bed reflection and this was not the case in our data. All wavelets identified as the drainage network exhibited the same polarity that resembles the ice-bed interface (albeit with different amplitudes) meaning that there is an increase in EM wave propagation velocity and thereby, ruling out an ice-air interface.**

Lines 148 and 150: The word "indicating" tells me that you are sure, whereas it seems that there is some uncertainty in this interpretation (i.e., other things could explain higher amplitudes in the bed reflection, as mentioned above). I would replace with "which may indicate". – **Updated manuscript as per suggestion.**

Line 162, "A 3D migration effectively collapses...": The migration does indeed collapse the Fresnel zones and improve the resolution of the data, but I don't think it reduces it to the bin size (lateral resolution must still depend on wavelength, as noted above). We could not, for example, collect 25 MHz data with an extremely small bin size in all directions and have some limitless improvement in horizontal resolution. – **Many thanks for pointing out this incorrect definition. This has been updated as per your suggestion to state the horizontal resolution shrinks to between ½ and ¼ wavelength post-migration.**

Figure 5: How are you sure that none of the identified high-amplitude features are airfilled, which would also generate a strong bed reflection? Some explanation or justification is needed in the text. - **We have added a section in the discussion relating to the fact that there**

**were no air-filled cavities present as a result of the consistent reflected EM wave's phase across the basal interface.**

Line 173, "This is the first time that a glacier's drainage network is imaged in 3D with GPR data": Given the existing literature, I think that this is over-selling things a bit and should be modified. Harper et al. (2010) and Egli et al. (2021) used similarly dense 3D acquisitions to image elements of the drainage system, whereas Hansen et al. (2020) used 3D data (albeit at a greater line spacing) to characterize the drainage network in 3D. – **We acknowledge this fact and have updated to state alongside Harper and Egli this is one of the first times that a glacier's network is imaged in 3D with GPR data.**

Lines 183-184: Again, the rather extreme width-to-height ratio was derived under the assumption of a water-filled channel, which must be justified or stated as an assumption. – **This is assumed however; we have evidence that it is water filled from borehole observations in 2018 (Church et al 2020) and the polarity of the reflected GPR wavelet. This part of the manuscript has been updated with this change.**

Line 199: Replace "evidence" with "possible evidence" to reflect that it's not certain that it's subglacial water accumulation. – **Added ' possible' to text.**

Line 207, "The high amplitude reflections along the basal interface (Fig 5a) represent water accumulations...": Again, this sentence conveys an absolute certainty, whereas it seems that there is some uncertainty. – **Have added some uncertainty into the wording by stating it is likely the result of water accumulations.**

Line 233, "We found the dimensions of the conduit were 60 times wider than its thickness...": See previous comments. This is assuming a water-filled channel which, given the channel size, may not be the case (?) – **See comment above**

Line 237: Replaced "indicated" with "suggested". – **Changed manuscript as requested.**

Line 240 to end: For the reader, this paragraph suggests that this is the first application of high-resolution 3D GPR data to image glaciers, which is not the case. Please modify accordingly. For example: "3D GPR data have been adopted and have proven to be successful for imaging small-scale targets within the fields of archaeology and investigating shallow fault zones, and to a lesser extent in glaciological investigations. This study further confirms the feasibility and the opportunities that are offered by implementing 3D GPR to image glaciers and their hydraulic networks." – **Updated manuscript with requested changes.**



# Ground-penetrating radar imaging reveals glacier's drainage network in 3D

Gregory Church<sup>1,2</sup>, Andreas Bauder<sup>1</sup>, Melchior Grab<sup>1,2</sup>, and Hansruedi Maurer<sup>2</sup>

<sup>1</sup>Laboratory of Hydraulics, Hydrology and Glaciology (VAW), ETH Zurich, Zurich, Switzerland

<sup>2</sup>Institute of Geophysics, ETH Zurich, Zurich, Switzerland

**Correspondence:** Gregory Church (church@vaw.baug.ethz.ch)

## Abstract.

Hydrological systems of glaciers have a direct impact on the glacier dynamics. Since the 1950's, geophysical studies have provided insights into these hydrological systems. Unfortunately, such studies were predominantly conducted using 2D acquisitions along a few profiles, thus failing to provide spatially unaliased 3D images of englacial and subglacial water pathways.

5 The latter has likely resulted in flawed constraints for the hydrological modelling of glacier drainage networks. Here, we present ~~for the first time~~ 3D ground-penetrating radar (GPR) results that provide ~~unprecedented~~ high-resolution 3D images of an alpine glacier's drainage network. Our results confirms a long-standing englacial hydrology theory stating that englacial conduits flow around glacial overdeepenings rather than directly over the overdeepening. Furthermore, these results also show exciting new opportunities for high-resolution 3D GPR studies of glaciers.

## 10 1 Introduction

Glacier movement is the combination of internal ice deformation and basal motion. Basal motion comprises both ice sliding over the glacier bed and the deformation of subglacial till (Cuffey and Paterson, 2010). Sliding at the ice-bed interface is responsible for high ice flow velocities (often 100%-400% faster than the annual mean flow velocity (Macgregor et al., 2005; Bingham et al., 2006; Bartholomew et al., 2010; Tuckett et al., 2019)) as a result of reduced friction at the ice-bed interface  
15 (Bartholomew et al., 2008). This reduction of friction is caused by the subglacial drainage network that lubricates this interface and increases subglacial water pressure, thereby either weakening subglacial sediments (Schoof, 2010) or lubricating the hard bedrock. In alpine glaciers and in Greenland, the subglacial drainage network is fed from surface meltwater that is routed through the englacial drainage network (Fountain and Walder, 1998). At the beginning of the melt season and with an increased availability of surface melt water, the subglacial drainage network often experiences an increase in water pressure, since the  
20 drainage network cannot adapt quickly enough to the increase in meltwater influx (Iken et al., 1983). During these periods with increased subglacial water pressure, changes in the glacier's sliding velocity are often observed (Gudmundsson et al., 2000; Sugiyama and Gudmundsson, 2004; Macgregor et al., 2005), and it has been widely documented that increased glacier sliding velocities have the potential to increase the glacier's mass loss (Zwally et al., 2002; Joughin et al., 2008; Schoof, 2010). Whilst the existence of these variations in ice flow velocities are undisputed, there is limited observations of the hydrological system's



25 geometry and its temporal variations, thus hampering a deeper understanding of these seasonal variations (Hart et al., 2015; Church et al., 2020).

The glacier's hydrological system can be probed using a variety of methods. Direct observations have been made from boreholes (Fountain et al., 2005), tracer testing (Nienow et al., 1996), speleology (Gulley, 2009; Gulley et al., 2009; Temminghoff et al., 2019) and geophysical measurements. The latter include predominantly active (Peters et al., 2008; Zechmann et al., 2018; Church et al., 2019) and passive (Podolskiy and Walter, 2016; Lindner et al., 2019; Nanni et al., 2020) seismic measurements or ground-penetrating radar (GPR) measurements (~~Moorman and Michel, 2000; Stuart et al., 2003; Irvine-Fynn et al., 2006; Harper et al., 2010; Bælum and Benn, 2011; Hansen et al., 2019~~). Most glaciological GPR studies, published so far, relied on two-dimensional (2D) data, where GPR measurements were acquired along profiles. 2D data sets are typically unable to image complex subsurface structures, such as glacier drainage networks, and the resulting interpretations may thus be inconclusive. For small-scale targets, such as archaeology sites (Böniger and Tronicke, 2010) and shallow fault zones (McClymont et al., 2008), 3D GPR surveys have established themselves as a powerful and efficient ~~option tool~~ to image complex subsurface structures. ~~However, spatially 3D GPR surveys are composed of densely spaced multiple line-by-line 2D GPR profiles that are collectively processed and are able to avoid both sampling bias in the profile's in-line direction and aliasing in the cross-line direction. Spatially~~ unaliased 3D GPR data sets (i.e., datasets with a data point spacing smaller than the dominant wavelength of the GPR signals (Sheriff and Geldart, 1995; Grasmueck et al., 2005)) are ~~uncommon rare~~ in glaciological applications. This is unfortunate, because 3D GPR provides subsurface images that can be viewed from arbitrary directions, thus allowing for an unequivocal interpretation. Furthermore, 3D GPR glaciological surveys can provide high spatial resolution imaging of the glacier's drainage network. Such an approach would be particularly useful for glacier drainage networks, and should be feasible because of the strong reflections caused by the very pronounced electrical impedance contrasts at ice/water interfaces (Reynolds, 1997).

To date, there are only a small number of glaciological studies leveraging 3D GPR to gain insights into the glacier's hydraulic system. 3D GPR data were used by Harper et al. (2010) to investigate basal crevasses and the subglacial hydraulic network on Bench Glacier, Alaska. More recently, Egli et al. (2021) acquired and processed 3D GPR surveys over two Swiss glaciers and successfully imaged the subglacial drainage network with the analysis of the reflected GPR amplitudes. Several glaciological studies (Schaap et al., 2019; Hansen et al., 2020; Church et al., 2020) have used multiple 2D GPR to investigate the englacial drainage structure in both cold and temperate ice; however, as far as we are aware, there are no studies leveraging 3D GPR studying in order to image an englacial drainage network.

The direction that meltwater flows under and within a glacier is driven by the spatial gradient of the hydraulic potential, outlined by Shreve (1972), where the hydraulic gradient is a function of both the water pressure gradient and the elevation potential gradient. Subglacial water flows along the hydraulic gradient and upon meeting an overdeepening, Lliboutry (1983) hypothesised the water flows along the glacier's flank as so-called gradient conduits, therefore avoiding the deepest part of the overdeepening (Cook and Swift, 2012). According to Lliboutry's theory, these conduits should be located at the same altitude as the lowest point of the riegel that produces the overdeepening. This hypothesis has a direct consequence on glacier sliding theory as no subglacial waterways should exist in the overdeepening and thereby potentially altering the glacier's sliding velocity.

- 60 In this study ~~we~~ there are three main objectives, namely to
- demonstrate the feasibility of and opportunities offered by 3D GPR imaging on glaciers. ~~Therefore, we performed a 3D GPR survey over a temperate alpine glacier to delineate the drainage network and~~
  - provide much needed hydrological observations to ~~confirm~~ determine whether they are in agreement with long-standing glacier hydraulic theory. ~~Furthermore, such GPR surveys are able to~~ regarding englacial water pathways around overdeepenings
- 65 as described by Llibouty (1983).
- provide an insight into future opportunities for high-resolution radar studies of glaciers.

## 2 Survey Site & Previous Work

The 3D GPR acquisition was conducted on Rhonegletscher, a temperate glacier located in the central Swiss Alps (Fig. 1a). ~~It~~ The Rhonegletscher is representative for the majority of European mountain glaciers with regard to its temperature distribution, ice dynamics and size (GLAMOS, 2017; Beniston et al., 2018). Rhonegletscher is the sixth largest glacier in the Swiss Alps (length: 8 km, surface area: 15.5 km<sup>2</sup> as of 2015 (GLAMOS, 2017)) and is heavily exposed to glacier melt due to the changing climate. Over the last decades, the glacier has continued to thin and it is currently retreating. As a result, a proglacial lake fed by the drainage network has been forming at its terminus since 2005 (Tsutaki et al., 2013).

75 ~~a) Rhonegletscher ice thickness in 2019 (colours) and bedrock elevation (contours) estimated using GlaTe modelling 59 from interpolated radar profiles. The red box represents the zoomed area for panel (b). b) Lower ablation zone of Rhonegletscher showing ice thickness (colour) and bedrock elevation (contours). The grey polygon represents the 3D GPR survey site, three GPR profiles A-A', B-B' and C-C' are shown in Figure 2 and the crossing points of the GPR profiles are represented by a yellow and red dot. Co-ordinates for all plots are local swiss co-ordinates LV03. Orthophoto was provided by Swiss Federal Office of Topology: Reproduced by permission of swisstopo (JA100120), ©2020 swisstopo (JD100042)~~

## 80 3 **Methods**

### 2.1 **Data Acquisition**

~~To detect and characterise the drainage network located at the glacier's tongue, we acquired a high-resolution 25 MHz. The 3D GPR survey. This survey was motivated by the results of earlier 2D surveys including active seismic data (Church et al., 2019). In 2017, a strong englacial reflection was identified from both active 2D seismic data and 2D GPR measurements and reflection analysis resulted in a water-filled englacial conduit being identified (Church et al., 2019). In the 2018 melt season a borehole was drilled into the englacial conduit and a borehole camera observed a water-filled and actively flowing hydraulic network. During 2018 and 2019 repeated GPR measurements on a coarse grid of 2D lines (Church et al., 2020) and a drilling campaign in 2018, which provided initial imaging of a potential drainage network and its seasonal changes. The repeated measurements provided evidence that the englacial conduit was  $0.4\text{ m} \pm 0.35\text{ m}$  thick,  $17.5\text{ m} \pm 8.5\text{ m}$  wide and highlighted seasonal variations~~

85 analysis resulted in a water-filled englacial conduit being identified (Church et al., 2019). In the 2018 melt season a borehole was drilled into the englacial conduit and a borehole camera observed a water-filled and actively flowing hydraulic network. During 2018 and 2019 repeated GPR measurements on a coarse grid of 2D lines (Church et al., 2020) and a drilling campaign in 2018, which provided initial imaging of a potential drainage network and its seasonal changes. The repeated measurements provided evidence that the englacial conduit was  $0.4\text{ m} \pm 0.35\text{ m}$  thick,  $17.5\text{ m} \pm 8.5\text{ m}$  wide and highlighted seasonal variations

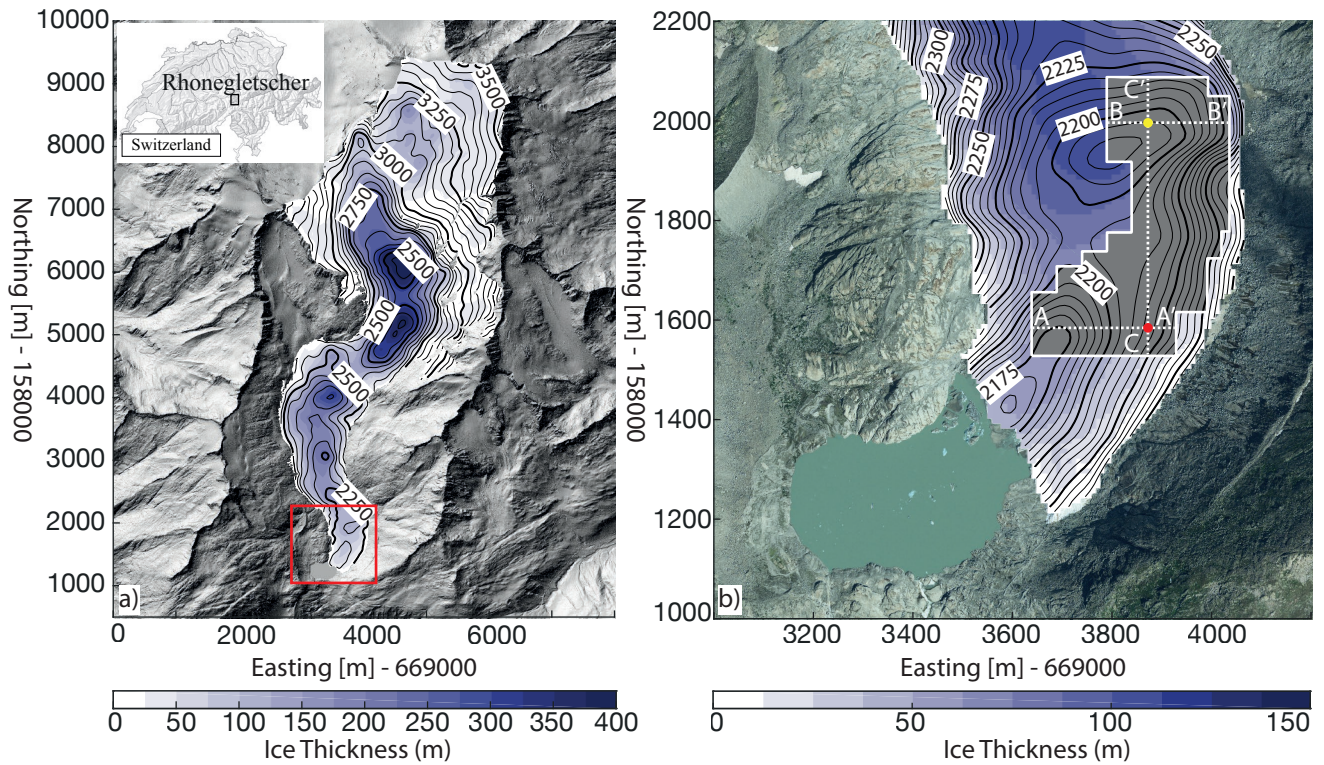

**Figure 1.** a) Rhonegletscher ice thickness in 2019 (colours) and bedrock elevation (contours) estimated using the GlaTe model from 59 interpolated radar profiles acquired between 2003 and 2008 as described by Grab et al. (2021). The red box represents the zoomed area for panel (b). b) Lower ablation zone of Rhonegletscher showing ice thickness (colour) and bedrock elevation (contours). The grey polygon represents the 3D GPR survey site, three GPR profiles A-A', B-B' and C-C' are shown in Figure 2 and the crossing points of the GPR profiles are represented by a yellow and red dot. Co-ordinates for all plots are local swiss co-ordinates LV03. Orthophoto was provided by Swiss Federal Office of Topology: Reproduced by permission of swisstopo (JA100120), ©2020 swisstopo (JD100042)

90 of an actively flowing englacial conduit. However, the surveys failed to image the larger extent of the drainage network and determine whether it connects to a subglacial hydraulic network. Additionally, it had limited spatial resolution due to the 2D nature of the GPR data. The englacial network is located within an overdeepening and therefore provides a suitable candidate to determine whether the network is in agreement with current hydraulic theory.

### 3 Methods

#### 95 3.1 Data Acquisition

To detect and characterise the drainage network located at the glacier's tongue, we acquired a high-resolution 25 MHz 3D GPR survey. Between 15<sup>th</sup> July 2020 and 23<sup>rd</sup> July 2020, GPR data were acquired over the area expected to harbour the englacial conduit network (Fig. 1b).

The survey covered an area of 140,000 m<sup>2</sup>, within which the ice thickness varied between 25 and 110 m and where the glacier bed forms a distinct overdeepening (Fig. 1b). The common-offset GPR data were collected using a Sensor & Software PulseEkko® system with an antenna separation of 4 m and carried by hand at approximately 1 m above the glacier ice surface. The sampling rate of the GPR system was 1 GHz, giving a time resolution of 1 ns, and thereby providing a vertical spatial resolution in temperate ice of 0.168 m. The use of a large sampling frequency allows small topographical changes from trace to trace of <0.2 m to be observed (King, 2020). A GPR stacking of 4 improved the signal-to-noise ratio and allowed the GPR data to be acquired with average walking speed of approximately 0.4 m per GPR trace. For all GPR lines, a high precision global navigation satellite system (GNSS) continuously recorded the x, y, z coordinates of the centre point between the transmitting and receiving antennas every second. The average accuracy of the GNSS during GPR acquisition was 0.008 m.

The survey area was covered with 281 2D GPR profiles, resulting in a total profile length of approximately 85 km. The ~~3D GPR data~~ GPR data for our 3D processing workflow were collected perpendicular to the ice flow direction ~~and profiles were interspaced with 2 m~~ interspacing between 2D profiles. The line spacing was chosen, such that the diffractions and reflections within the ice body would not become aliased for our antenna frequency of 25 MHz. To ensure data were consistent across the duration of the survey, two GPR lines were always repeated from the previous day's acquisition. Furthermore, six orthogonal profiles were collected along the glacier flow.

### **3.1.1 Data Processing**

## **3.2 Data Processing**

All GPR common offset data were processed using a combination of an in-house MATLAB-based toolbox (GPRglaz) (Grab et al., 2018) and SeisSpace ProMAX 3-D. The processing was based upon a typical 3D seismic data processing workflow. Initially, the GPR data were assigned to their corresponding GNSS data. Since the GNSS data were recorded every second and GPR data were recorded approximately every 0.3 seconds, the GNSS data were linearly interpolated to provide the same temporal resolution as the GPR data. The data were then corrected for time zero, and a Butterworth bandpass filter was applied in order to suppress any noise outside the GPR frequency band and thus to increase the signal-to-noise ratio. Overlapping GPR data between different acquisition days were used to investigate whether a data matching filter was required. However, no amplitude matching was required, due to the fact that the GPR equipment used produced stable and repeatable GPR data. Subsequently, the data were 3D binned using a master grid of 2 m between GPR profiles (inline spacing) and 0.5 m between GPR data points within the profile (crossline spacing). 3D binning consists of assigning each GPR trace to the closest bin centre. As a result of the variable walking speed and walking around crevasses during acquisition, a number of bins had more than a single GPR trace assigned (known as over-fold), whereas other bins (i.e. bin located within a crevasse) were empty. GPR data points were removed from bins that had more than one GPR data point and therefore, this resulted in the bins

containing either a single GPR data point or no GPR data point. Such a processing step is required in order not to leave an  
130 amplitude imprint on the data during the ~~interpolation and regularisation stages. The GPR interpolation stage. In summary, the~~  
~~interpolation is two-fold: 1) GPR data were interpolated and regularised, such that each bin within the survey boundary had an~~  
~~interpolated GPR trace at the centre of the bin in bins without any GPR data and 2) the GPR data were interpolated such that~~  
~~all GPR data were moved to their bin centre.~~

A 3D Kirchhoff migration algorithm re-positioned the reflected and diffracted signals back to their correct subsurface lo-  
135 cation. The Kirchhoff migration algorithm was performed using an EM wave propagation velocity of ice ( $0.167 \text{ m ns}^{-1}$ ) and  
~~furthermore as velocities between  $0.165$  and  $0.170 \text{ m ns}^{-1}$  were confirmed for this site by Church et al. (2020). Furthermore,~~ the  
algorithm corrected for amplitude losses from geometrical spreading, ~~whereas no correction for radiation pattern was applied.~~  
Prior to interpretation ~~the data were corrected for attenuation,~~ a topographic correction, an amplitude correction using a Q  
~~attenuation~~ compensation (Irving and Knight, 2003), and a second Butterworth bandpass filter was applied to further im-  
140 prove the signal-to-noise ratio, ~~and the data were stretched and suppressing high frequency noise artificially increased by the~~  
~~Q-compensation correction. Finally, the data were converted~~ from the time to depth domain using a constant velocity of  $0.167$   
 $\text{m ns}^{-1}$ .

The 3D interpretation was performed in dGB Earth Sciences OpendTect. The ice-bed interface was manually picked, lin-  
early interpolated, smoothed and constrained to within the survey area. ~~Similarly~~ Secondly, the drainage network was ~~picked~~  
145 ~~at a similar horizontal spacing, located from the 3D processed GPR data as the strongest continuous coherent reflection~~  
~~and manually picked with aid of previous GPR, seismic and borehole studies (Church et al., 2019, 2020). Subsequently, the~~  
~~drainage network was~~ linearly interpolated and smoothed. ~~The spatial extent of the drainage network was determined from~~  
~~the GPR depth slices~~ In order to ensure the picked drainage network encompassed the entire observable drainage network in  
the GPR survey area, GPR elevation slices were investigated in order to locate strong englacial and subglacial reflections that  
150 ~~could represent a water-filled drainage network~~ (Fig. 3) and also by extracting the root-mean squared amplitude between the  
surface and the ice-bed interface. Finally, the reflected GPR amplitudes were extracted from both the ice-bed interface and the  
drainage network by using a 2 m window ( $\pm 1 \text{ m}$ ) centred around the feature. ~~During interpretation care was taken along the~~  
~~edges of the survey as a result of GPR data migration edge effects.~~

## 4 Results

### 155 4.1 Overview of GPR results

Displaying 3D models adequately is generally a non-trivial task. Below, we discuss the GPR results using a variety of vertical  
and horizontal cross sections. In our view, such data sets are represented best in form of movies showing scans along different  
directions. We therefore highly encourage the readers to check the digital supplement.

Selected 2D profiles of the 3D GPR data cube are shown in Figure 2. A water-filled englacial conduit can be identified as  
160 a continuous specular strong reflector (Fig. 2a, b, c). The ~~majority of the~~ ice-bed interface is identifiable as a weak reflection



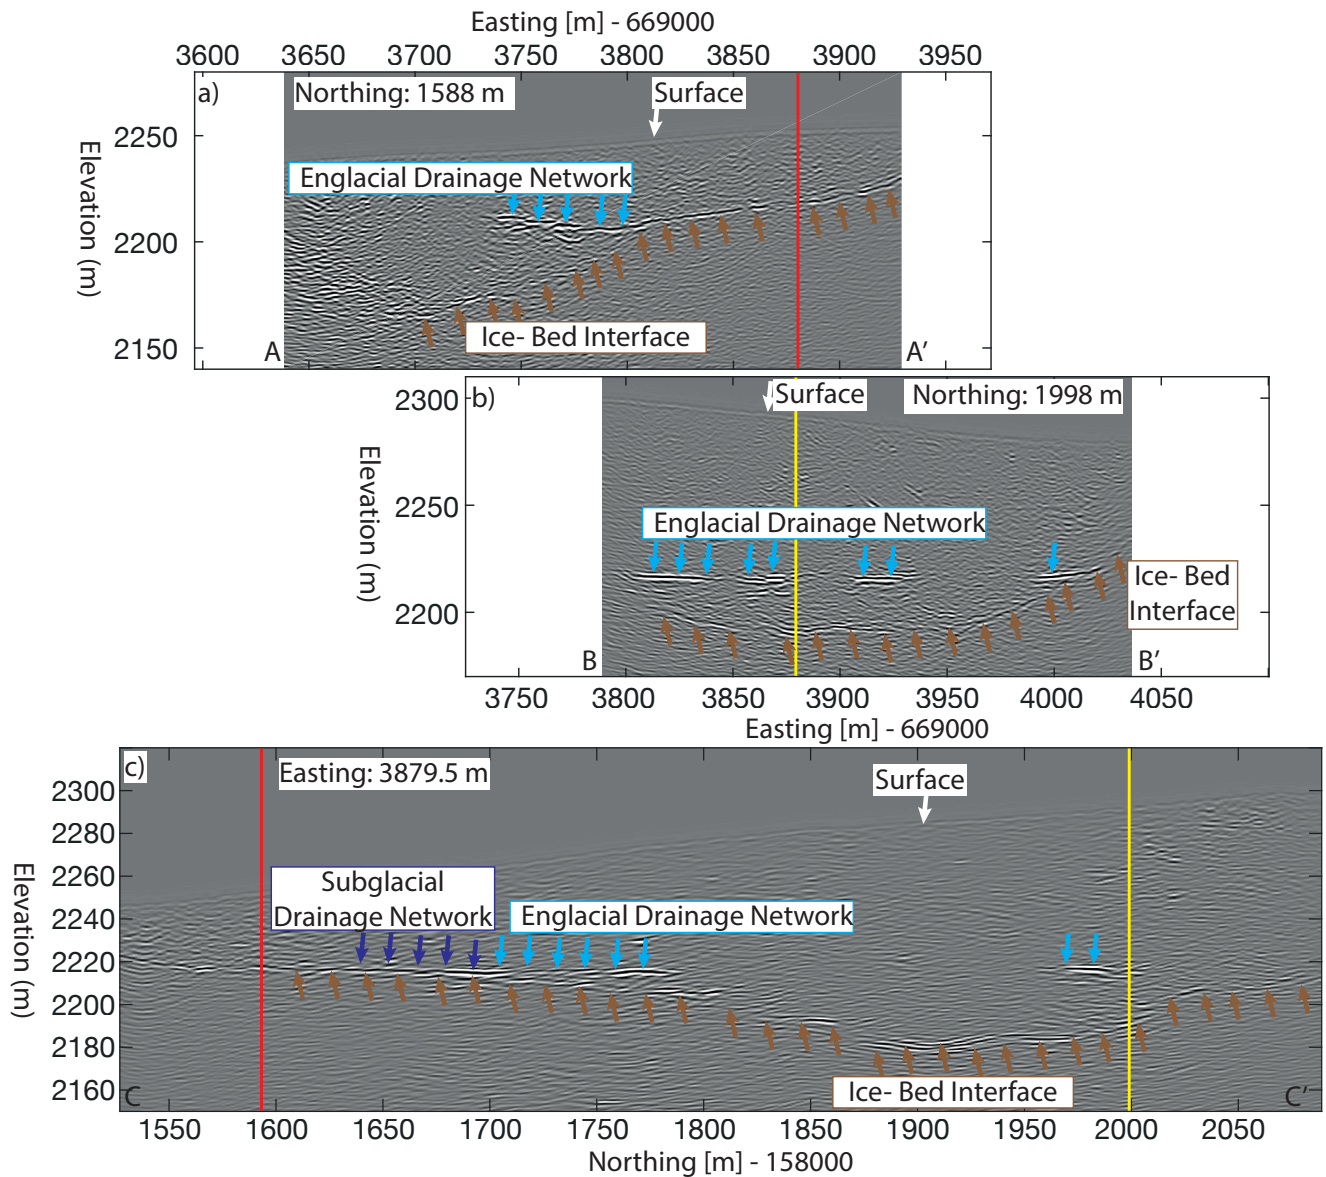

**Figure 2.** a) GPR inline profile (perpendicular to ice-flow direction), the glacier surface, drainage network and basal interface are marked and the red line represents the crossing point for profile c). b) GPR inline profile (perpendicular to ice-flow direction), the yellow line represents the crossing point for profile c). c) GPR crossline profile (parallel to ice-flow direction). The locations of the profiles are shown in Figure 1b and 3

(Fig 2), indicating that subglacial water is not present. However, in isolated areas, the ice-bed interface has been identified as strong ice-bed reflections (Fig. 2c) and thereby indicating the presence of subglacial water.

The lateral extent of the englacial and subglacial network can be characterised by analysing horizontal slices of the 3D GPR data cube. A slice at 2216 m.a.s.l shows a strong meandering reflection in the northern part of the survey (Fig 3a). The strong reflection is traceable on the eastern edge of the survey before fading out towards the southern edge. At 2213 m.a.s.l (Fig 3b), there is a continuation of the strong reflection, but it becomes more diffusive in the central part of the survey area. At 2210 m.a.s.l (Fig. 3c), we observe another strong meandering reflection that heads southwards towards the terminus of the glacier. There is an approximately 6 m topographic difference between the drainage network in the survey's northern edge and the southern edge indicating that the imaged drainage network has a shallow global inclination along the flow (<1 degree).

## 4.2 Spatial distribution of drainage network

The 3D GPR survey imaged an active meltwater drainage network within the survey boundary. It comprises both, an englacial and subglacial drainage network. The entire detectable drainage network was identified from the final processed GPR data, and reflected amplitudes from the drainage network were extracted (Fig 4a) as detailed in the data processing section. The conduit network can be delineated by areas of high amplitude (~~red-yellow~~ in Fig. 4a). Furthermore, the drainage network can be split into four separate components labelled in Fig. 4b:

- (A) A meandering well-defined englacial conduit spanning the ~~overdeepen~~-overdeepening oriented perpendicular to the glacier flow,
- (B) An englacial conduit oriented parallel to the glacier flow traversing the ~~overdeepen-and-flowing~~-overdeepening and flows alongside the glacier's flank,
- (C) The englacial conduit in B ~~flows into a~~-connects to the subglacial drainage system, the subglacial drainage network consists of a single main conduit (Fig 4a), that has a sinusoidal nature,
- (D) The subglacial conduit in C encounters a basin and ~~flows into another englacial conduit~~-encounters a diffusive network of englacial conduits towards the terminus of the glacier that are poorly imaged.

Given the glacier ice flow direction (N-S) and the ice-thickness distribution, the water in the conduit is expected to flow from north to south. The high-resolution results allow the width of the drainage network to be examined and the uncertainty is attributed to the post-migration lateral resolution. The mean width of the northern sinusoidal englacial conduit, which flows across the overdeepening (Fig. 4b Section A), is  $8 \pm 1.7$  m. As the network flows southwards around the overdeepening (Fig. 4b Section B) the width increases to  $11 \pm 1.7$  m. Furthermore, the mean width of the subglacial drainage conduit (Fig. 4b Section C) is  $17 \pm 1.7$  m, and finally at the southern edge of the survey site, the mean width of the diffusive englacial drainage network is  $25 \pm 1.7$  m (Fig. 4b Section D). The thickness of the conduit in section A has previously been investigated in Church et al. (2020), and it was found to be at the limit of the 25 MHz GPR vertical resolution at 0.4 m, when assuming the conduit is water-filled. The conduit thickness in sections B, C and D are also at the limit of the vertical resolution as only a single reflection is visible (Fig. 2c). If the conduit thickness was beyond the vertical resolution, two separate englacial reflections

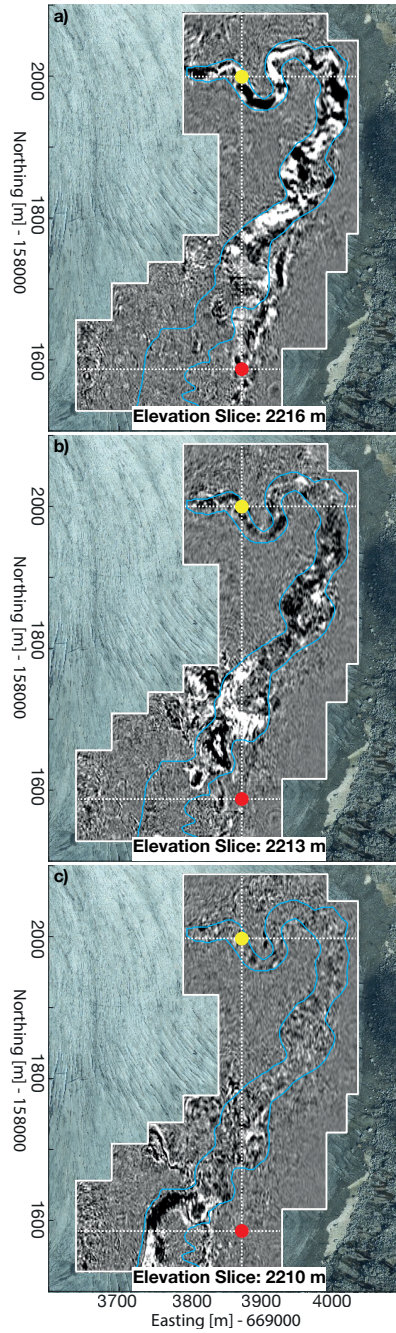

**Figure 3.** a) Depth slice through the GPR 3D data cube at 2216 m amsl. b) 2213 m amsl. c) 2210 m amsl. The blue line represents the outline of the drainage network. The white dashed line represents the GPR profiles from Figure 2 and the red and yellow dot represents their crossing points.



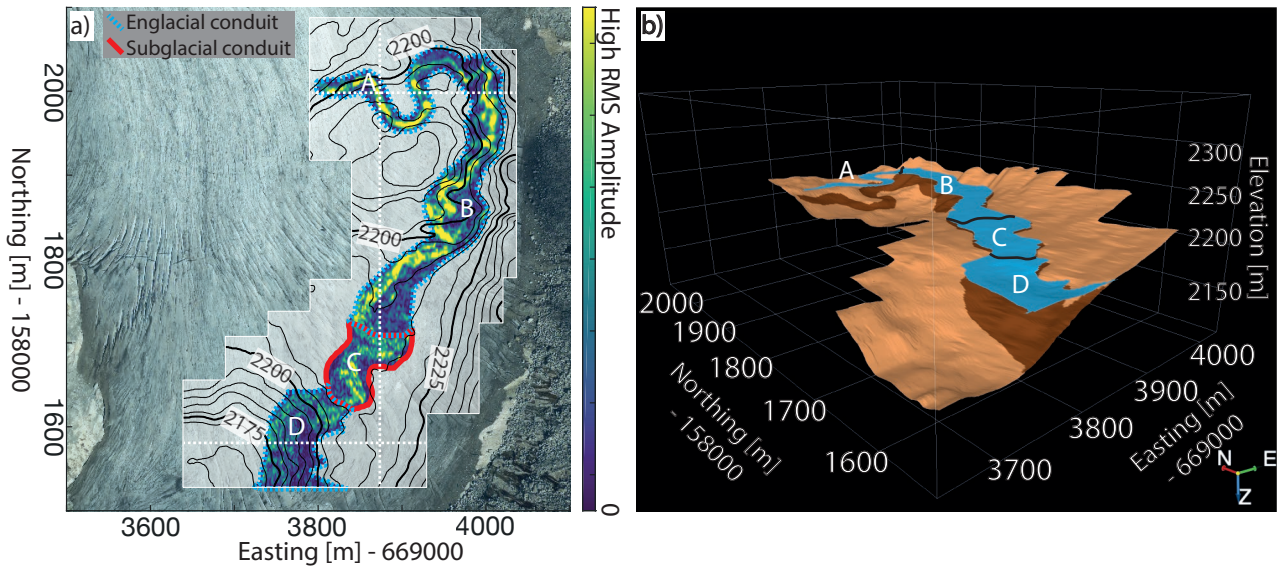

**Figure 4.** a) The root-mean-squared amplitude, extracted from the picked glacial drainage network, within  $\pm 1$  m of the drainage network. Contours represent the basal topography picked from the 3D GPR processed data. Colours of the drainage network represent the reflected amplitudes and areas of high amplitude indicate the presence of water. b) 3D view of basal interface (brown) and drainage network (blue). The drainage network is split into 4 components labelled A to D and referred to in the text.

would be visible representing the top and bottom of the conduit. Consequently, the channels throughout the study area are thinner than 0.4 m, and therefore, their shape is significantly smaller in the vertical direction than lateral.

### 4.3 Basal reflected amplitude

The amplitude of the ice-bed interface was extracted from the basal horizon as well. This provided insights into the ~~local-basal~~ conditions-basal conditions such as bedrock type and whether subglacial water is present. In the southern region of the survey site, the ice-bed interface reflection has an identical amplitude and spatial distribution to the drainage network (Fig. 5a and c white arrows), thereby indicating this area is ~~positioned-along-the-main~~ identical to the drainage network identified in Figure 4a. In the northern region of the survey site, instead, there are numerous isolated high ~~amplitudes-amplitude~~ basal reflections (Fig. 5a), mostly situated within localised flat areas (Fig. 5 b red arrows) and most likely indicating a pooling of water. In addition, ubiquitous areas of high amplitude basal reflections are present along the southern region of the survey, ~~indicating-that could~~ indicate the presence of subglacial water (Fig. 5a and c pink arrows). In comparison to the isolated patches in the northern region, these high amplitude basal patches in the southern region appear to be partially connected to each other indicating the possibility of an additional ~~connected~~ subglacial drainage system -away from the main drainage network. These areas were not picked as part of the main drainage network due to their different data characteristics (not being connected to the main drainage network - white arrows in Fig. 5).

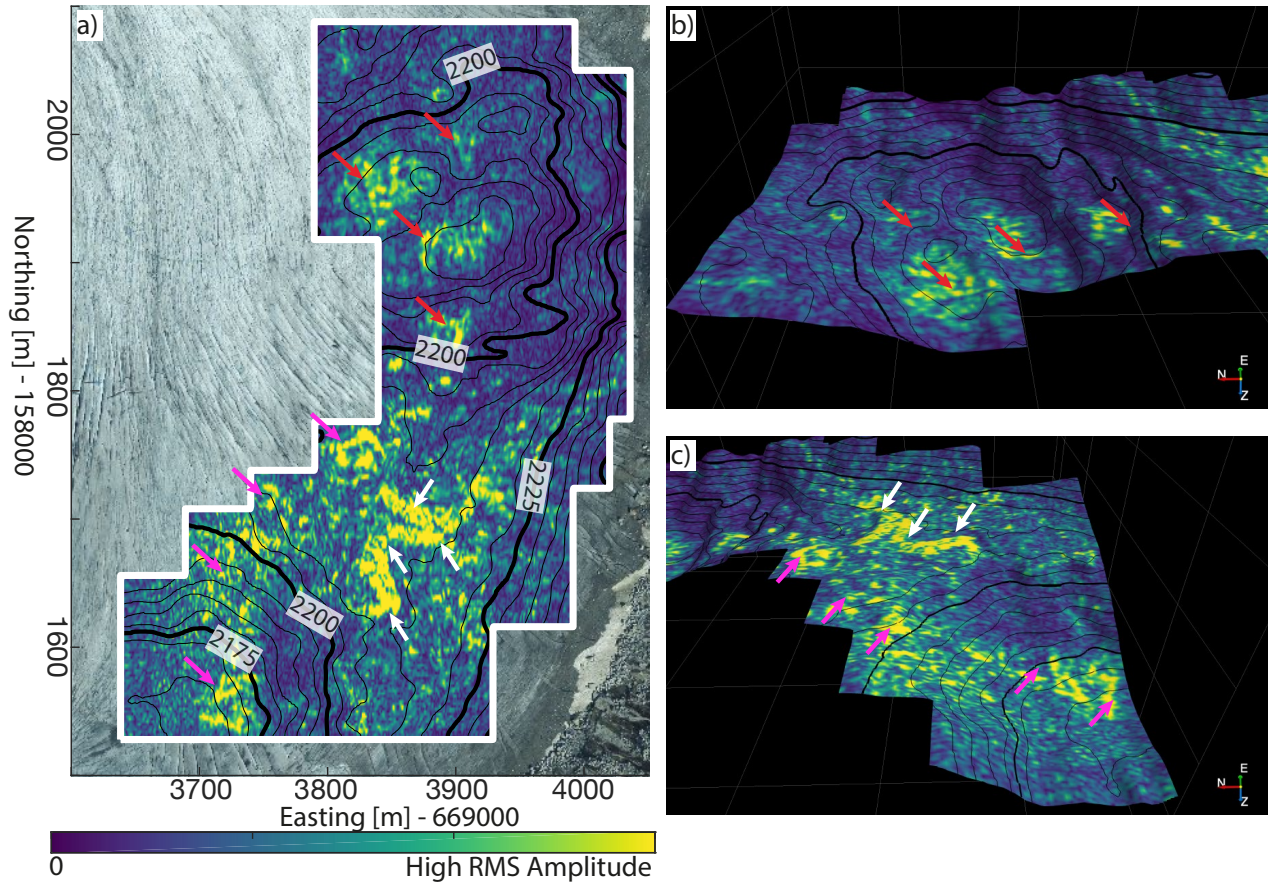

**Figure 5.** a) Map view of the extracted basal root-mean squared amplitude within a  $\pm 1$  m window. Contours represent the basal topography [picked from the 3D GPR processed data](#). b) Extracted basal amplitude in the northern part of the survey highlighting isolated high amplitude basal reflections situated in localised flat zones, c) extracted basal amplitude in the southern part of the survey highlighting connected high amplitude basal reflections. The red arrows represent isolated water cavities along basal interface, the white arrows represent the main drainage network detected in Fig. 4. The pink arrows indicate the presence of subglacial water flow away from the main drainage network identified in Fig 4.

#### 4.4 Comparison of 2D and 3D GPR processing

210 2D GPR surveys along single profiles are the current approach in [today's](#) glaciological applications, although such data sets have imaging limitations. Besides being unable to provide [high resolution](#) 3D subsurface images, 2D GPR techniques assume all reflections originate from the vertical plane of the acquisition. Complex englacial structure or basal geometry can result in a reflection originating from outside of the acquisition plane, in turn resulting in distortions to the final processed GPR image. Figure 6 shows an example [of ray path causing](#) such a distortion [as a result of off-nadir reflections](#). These distortions

215 are particularly severe for complex geometry of alpine glaciers

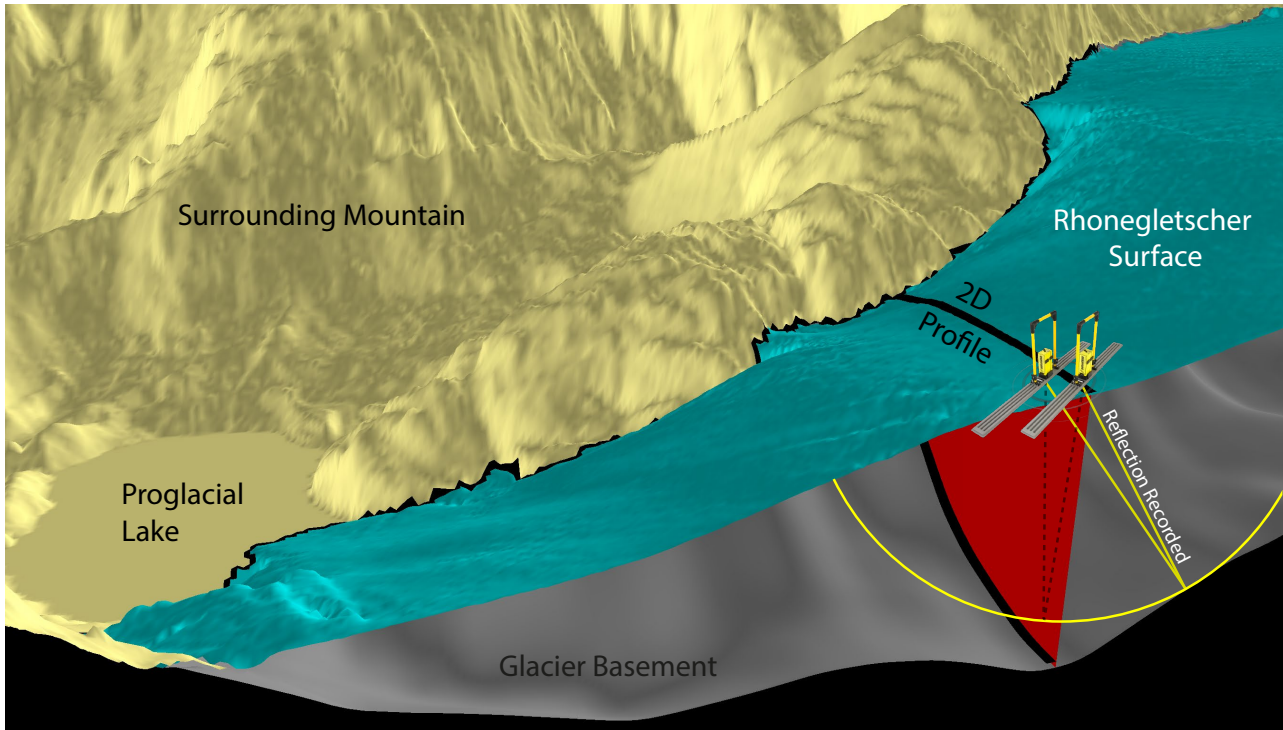

**Figure 6.** Lower portion of Rhonegletscher showing an example GPR data point acquired. The GPR antennas are located on the surface and the yellow lines represent the shortest ray path for a reflection from the glacier basement. The dashed black ray path represents the basement imaging point when performing 2D GPR processing. This ray path does not correspond to the true basement position but the out-of-plane basement reflection point. [This type of ray path is known as an off-nadir reflection.](#)

3D GPR acquisition and processing are able to mitigate these distortions. The Rhonegletscher GPR data cube is the product of a 3D processing workflow and with the employment of 3D migration over conventional 2D migration, the distortions from out-of-plane reflections are removed and an improvement in lateral resolution is gained. A 3D migration effectively collapses the Fresnel zone in both inline and crossline directions, thereby reducing the lateral resolution to the [3D bin size \(2 m x 0.5 m\) wavelength of the EM wave propagating through ice](#). This lateral resolution ~~improved~~ leads to improvements in subsurface imaging, as two closely laterally-separated reflectors are able to be imaged as two individual reflectors.

A comparison between GPR data processed with two different workflows (2D GPR workflow (Figure 7a) and 3D GPR workflow (Fig. 7b)) highlights the imaging differences on both the englacial conduit network and the ice-bed interface. Generally, both workflows produce similar subsurface images however, there are subtle differences that indicate a ~~more unambiguous~~ [less ambiguous](#) interpretation with the 3D GPR workflow. The ice-bed interface in the 3D GPR data cube has increased reflector continuity in comparison to the 2D workflow (Fig. 7 brown arrows). Furthermore, the englacial conduit imaged using a 3D GPR workflow has fewer artefacts and is absent of events that are incorrectly intersecting the englacial conduits (Fig. 7 blue arrows). [Additional 2D and 3D GPR comparisons are provided as supplement figures \(Fig. S1\).](#)



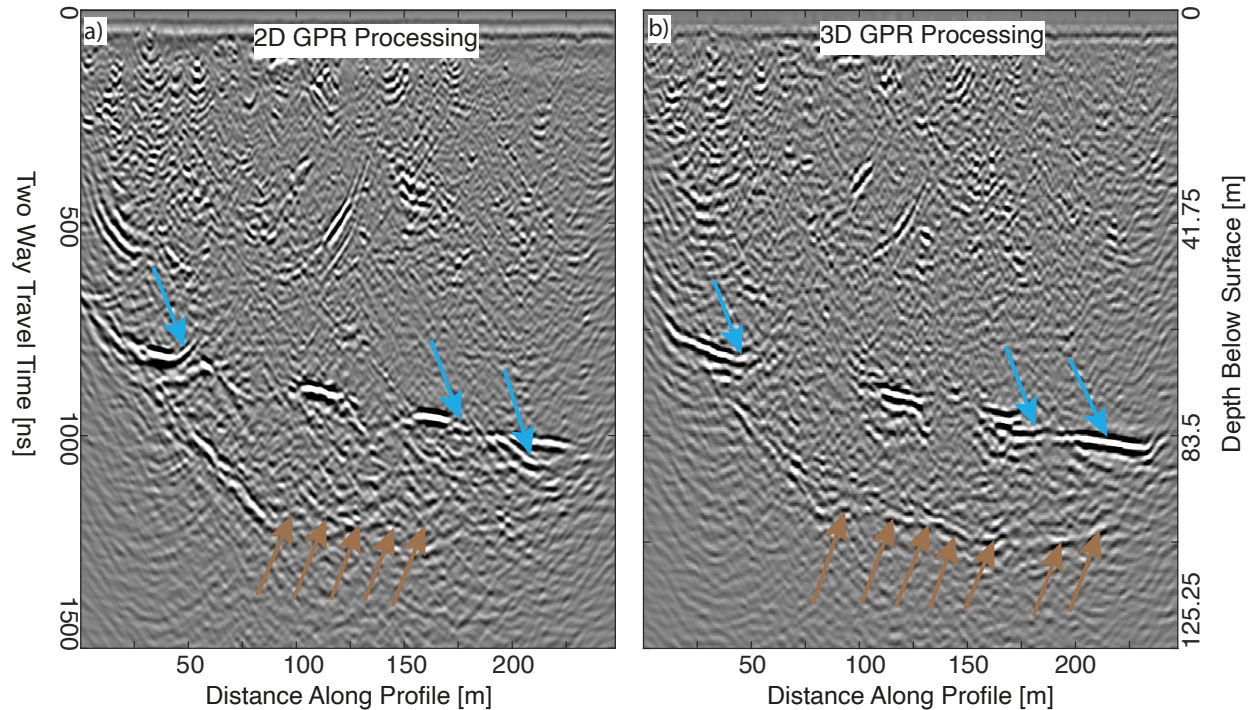

**Figure 7.** a) A single GPR data profile processed using with a 2D GPR workflow. b) Single line extracted from multiple GPR profiles processed using a 3D GPR workflow.

## 5 Discussion

### 230 5.1 Geometry of drainage network

~~This is the first time~~ Alongside Harper et al. (2010) and Egli et al. (2021), ~~this is one of a few times~~ that a glacier's drainage network is imaged in 3D with GPR data, thus providing ~~an unprecedented,~~ high-resolution information of the geometry from such a system. ~~In our case, it~~ The Rhonegletscher's drainage network identified in this study has a meandering nature throughout the survey area, ~~and the drainage network's width increases with an increasing network width~~ towards the terminus of the glacier. Moreover, it consists of a single dominant conduit that alternately flows ~~through~~ englacial and subglacial ~~channels, known as Röthlisberger channels (Röthlisberger, 1972).~~ Such a drainage network is known as an efficient channelised network. Studies from both cold-ice (Chandler et al., 2013) and temperate-ice (Nienow et al., 1996, 1998; Mair et al., 2002) glaciers have shown that early in the melt season, the glacier's drainage network is slow and inefficient. Typically, it evolves into a fast channelised drainage network just before the peak of the glacier's discharge. Since the peak discharge for Rhonegletscher is typically mid-August (GLAMOS, 2017) and thus occurred one month after the acquisition, the drainage network is expected to be in a channelised configuration. ~~The 3D GPR imaging results confirm that the network consists of a single, wide conduit, that alternately flows through englacial and subglacial channels, known as Röthlisberger channels (Röthlisberger, 1972).~~

The theoretical shape of englacial drainage conduits is circular, however the drainage network imaged on Rhonegletscher is up to a maximum of 60 times wider than its thickness when water-filled (according to both borehole observations and reflected GPR polarity). Such an observation contradicts the theory of circular conduit cross-sectional shape proposed independently by Shreve and Röthlisberger (Röthlisberger, 1972; Shreve, 1972) but is in line with the further development by Hooke et al. (1990). The latter author concluded that conduit's are broad and low based upon measured and calculated subglacial water pressures on Storglaciären, Sweden. Such channels can directly impact the glacier dynamics as Hooke-channels can lead to increased hydraulic friction and thus higher water pressure than theorised R-channels. This increase in hydraulic friction is not only a result of the channel's shape but also due to higher closure rates of the conduit. Thereby, the impact on ice dynamics is that such a configuration would support higher sliding velocities. Furthermore, Werder et al. (2010) found that the hydraulic friction interpreted from tracer experiments could be well explained by assuming low and broad channels (i.e., Hooke channels).

Lliboutry (1983) hypothesised that when water encounters an overdeepening, the water flows along the glacier's flank as so-called gradient conduits, therefore avoiding the deepest part of the overdeepening (Cook and Swift, 2012). According to Lliboutry's theory, these conduits should be located at the same altitude as the lowest point of the riegel that produces the overdeepening. The 3D GPR data suggest that in the case of Rhonegletscher, the flow paths indeed route meltwater around the overdeepening rather than across it (Fig. 4b Labelled: B). Similarly, the elevation of the englacial conduit that is located around the overdeepening coincides with the elevation of the riegel and also the proglacial lake level. These observations support the long-standing theory, but was never verified by field observations.

Subglacial and englacial water flows as a response of changing hydraulic potentials. This hydraulic potential can be estimated by assuming spatially uniform flotation fraction as described in Flowers and Clarke (1999) and within the imaged Rhonegletscher's drainage network the water flow routing followed the gradient of the hydraulic potential and not along a single hydraulic potential contour.

## 5.2 Water accumulation in temperate glaciers

In addition to the detection of the primary drainage network, the 3D GPR data provided possible evidence of subglacial water accumulation. GPR-based detection of large amounts of subglacial water, such as subglacial lakes is well established (Ridley et al., 1993; Siegert et al., 2005; Palmer et al., 2013), but their spatial extent is often unclear as a result of the limitations of 2D GPR surveys. ~~This is in contrast to~~

From our 3D GPR data set, which can be used to delineate such extents. In addition we are able to delineate high-resolution changes to the basal interface. Furthermore, 3D GPR has the potential to identify smaller subglacial water accumulations, such as expected to occur within water-filled cavities. Subglacial cavities can form, when the sliding ice uncouples from the glacier bed as a result of either rapid glacier sliding or pronounced bed roughness (Nye, 1970). Two types of subglacial cavity system are generally distinguished – isolated cavities and linked cavities – and both cavity systems alter the glacier's dynamics (Lliboutry, 1976, 1979; Hoffman et al., 2016; Rada and Schoof, 2018). The high amplitude reflections along the basal interface (Fig 5a) ~~represent water accumulations and are likely representing either water accumulations along basal bedrock or saturated sediments both of which~~ appear to be isolated from each other, ~~thereby indicating that they are~~. However, saturated

sediments are unlikely on Rhonegletscher as a result of outcrops showing a granite bedrock with little sediment cover and borehole observations within the survey area showing a hard bedrock basal interface (Church et al., 2019). Furthermore, the location of these high amplitude basal reflections can be explained from the hydraulic potential when assuming low subglacial water pressure (Fig. S2a). On the other hand, when assuming high subglacial water pressure these high amplitudes are located along the hydraulic gradient (Fig. S2d). Due to the nature of the diurnal subglacial water pressure on Rhonegletscher (Sugiyama et al., 2008) it is therefore likely that these high amplitude basal reflections are indicative of potentially isolated water-filled cavities forming an inefficient drainage network. ~~It~~

High amplitude basal reflections could also result from air filled cavities. If an air-filled cavity existed, the recorded EM reflection would have opposite polarity to a water-filled cavity or hard bed reflection. In the case of the Rhonegletscher 3D GPR data set the phase of the basal reflection remained consistent across the survey suggesting that there are no imaged air-filled cavities within the survey area. Furthermore, it is interesting to note both an inefficient drainage network and an efficient network can coexist in overdeepenings (Hooke et al., 1990; Rada and Schoof, 2018). Although our data provide an instantaneous image of these systems, repeated 3D GPR surveys could also yield insights into their temporal dynamics.

### 290 5.3 Future of 2D and 3D GPR within glaciology

A 3D approach as presented within this contribution is feasible and highly beneficial over 2D GPR for detecting and quantifying dimension of a glacier's hydrological network. For large-scale investigations in Greenland and Antarctica, it will be more challenging to conduct 3D GPR surveys as a result of their spatial distribution and therefore, 2D GPR acquisition will likely continue to prevail. However, future radar surveys could be complimented with the use of 3D GPR acquisition, in order to reduce the ambiguity of interpretations in places of interest. The 2D and 3D GPR data processing comparison (Fig. 7 and Fig. S1) highlights the subtle difference in the advantage of 3D GPR processing. However, the 2D GPR dramatically suffers from poor lateral resolution when lines are spaced far apart (beyond the horizontal resolution). The 3D GPR processing provides significant imaging improvements over conventional 2D GPR by providing an increase in lateral resolution from 17 m to 1.7 m in a glaciological setting. Such an imaging improvement can be seen by comparing the extracted englacial conduit reflection from a sparse network of 2D GPR profiles in 2019 as described in Church et al. (2020) and the 3D GPR processing described here in 2020. The extracted amplitude of the englacial conduit (Fig. S3) from the 3D GPR processing in the north of the survey (section A in Fig. 4a) shows conduit width of  $8 \pm 1.7$  m; whereas the 2D GPR suggest a significantly wider englacial network  $17.5 \pm 8.5$  m.

The major limiting factors of such future 3D GPR surveys are the ~~rate-of-acquisition-and-time-consuming nature of ground-based GPR data acquisition~~, the accessibility of the field site ~~.Both due to dangers on the glacier such as heavily crevassed areas and the safety of personnel carrying heavy GPR systems.~~ All of these concerns ~~can-could~~ be addressed with drone technology. Drone technology is often used in cryosphere research (Gaffey and Bhardwaj, 2020) however GPR-based drone surveys are currently limited to landmine detection (Colorado et al., 2017; Sipos et al., 2017) and soil mapping (Wu et al., 2019). Developments of lightweight GPR systems are anticipated to provide the possibility of equipping small, uncrewed aerial vehicles (UAVs) with the capabilities to acquire 3D radar data in a fast and efficient manner. With sufficient power a drone-based

solution would acquire the Rhonegletscher data within an estimated 7 hours of flying time, instead of 9 days spent for the ground-based study.

## 6 Conclusions

By using a 3D GPR data set, we have produced unaliased imaging of the Rhonegletscher's drainage network in a section of its ablation zone that has led to confirming long-standing glacier hydraulic theory. Upon meeting an overdeepening, melt water is routed alongside the flank of the glacier within so-called gradient conduits and thereby avoiding the overdeepening.

The geometry of the drainage network was determined by extracting the root-mean-squared reflected GPR amplitude. Using this extracted GPR attribute, we were able to delineate a hydrological system in 3D, which includes connected englacial and subglacial conduits. Such observations were only possible due to the 3D nature of our data. 2D GPR imaging would have failed in determining the interconnectability of this hydraulic system and with such 2D GPR data a connection would only be the result of speculation. We found the dimensions of the conduit were 60 times wider than its thickness, which is in contrast to theory [that conduits are circular](#). However, these observations are in line with further conduit geometry developments by Hooke et al. (1990). From the geometry of the conduit network, we are able to confirm that the hydraulic system is an ~~as~~-efficient drainage network.

In addition to observing the main efficient drainage network, the extracted GPR reflected amplitude from the glacier's basal interface ~~indicated~~[suggested](#) that subglacial water is potentially pooling in numerous isolated localised flat areas. This localised pooling of water forms an inefficient drainage network. Thereby, both an efficient and inefficient drainage networks are able to coexist within overdeepenings.

3D GPR data have been adopted and have proven to be successful for imaging small-scale targets within the fields of archaeology and investigating shallow fault zones, [and to a lesser extent in glaciological investigations](#). This study illustrates the feasibility and the opportunities that are offered by implementing 3D GPR to image glaciers and their hydraulic networks. Alongside the development of lightweight GPR systems and uncrewed aerial vehicles, such future 3D GPR surveys will be acquired faster and in a more efficient manner and thereby ultimately lead to significant improvements in our understanding of glacier hydrology.

*Video supplement.* Movies showing inline, cross and depth slices through the 3D GPR cube can be found at <https://doi.org/10.3929/ethz-b-000471304>

*Author contributions.* GC, MG, AB, and HM designed the 3D GPR experiment, which were carried out by GC. GC processed the data and interpreted the data, with help from all co-authors. GC wrote the manuscript with comments and suggestions for improvements from all co-authors.

340 *Competing interests.* The authors declare that they have no conflict of interest.

*Financial support.* This research has been supported by the Schweizerischer Nationalfonds zur Förderung der Wissenschaftlichen Forschung (Grant no. 200021\_169329/1 and 200021\_169329/2).

*Acknowledgements.* Data acquisition has been provided by the Exploration and Environment Geophysics (EEG) group and the Laboratory of Hydraulics, Hydrology and Glaciology (VAW) of ETH Zurich. We especially thank L. Bührle, E. Mattea, D. May, V. Krampe and C.  
345 Walker for their support during the field data acquisition. We would like to gratefully acknowledge the Landmark Graphics Corporation for providing data processing software through the Landmark University Grant Program. The authors wish to acknowledge all volunteers for their valuable help in the fieldwork. Furthermore, we ~~thank~~would like to thank both Daniel Farinotti for an insightful in-house review, which improved the clarity of the manuscript and Mauro Werder for important insights into the discussion of the paper. We would also like to thank the editor Joseph MacGregor and the two anonymous reviewers for their constructive comments in order to improve the quality of  
350 the manuscript.



## References

- Bælum, K. and Benn, D. I.: Thermal structure and drainage system of a small valley glacier (Tellbreen, Svalbard), investigated by ground penetrating radar, *The Cryosphere*, 5, 139–149, <https://doi.org/10.5194/tc-5-139-2011>, 2011.
- Bartholomäus, T. C., Anderson, R. S., and Anderson, S. P.: Response of glacier basal motion to transient water storage, *Nature Geoscience*, 1, 33–37, <https://doi.org/10.1038/ngeo.2007.52>, 2008.
- Bartholomew, I., Nienow, P., Mair, D., Hubbard, A., King, M. A., and Sole, A.: Seasonal evolution of subglacial drainage and acceleration in a Greenland outlet glacier, *Nature Geoscience*, 3, 408–411, <https://doi.org/10.1038/ngeo863>, 2010.
- Beniston, M., Farinotti, D., Stoffel, M., Andreassen, L. M., Coppola, E., Eckert, N., Fantini, A., Giacona, F., Hauck, C., Huss, M., Huwald, H., Lehning, M., López-Moreno, J. I., Magnusson, J., Marty, C., Morán-Tejeda, E., Morin, S., Naaim, M., Provenzale, A., Rabatel, A., Six, D., Stötter, J., Strasser, U., Terzago, S., and Vincent, C.: The European mountain cryosphere: A review of its current state, trends, and future challenges, *Cryosphere*, 12, 759–794, <https://doi.org/10.5194/tc-12-759-2018>, 2018.
- Bingham, R. G., Nienow, P. W., Sharp, M. J., and Copland, L.: Hydrology and dynamics of a polythermal (mostly cold) High Arctic glacier, *Earth Surface Processes and Landforms*, 31, 1463–1479, <https://doi.org/10.1002/esp.1374>, 2006.
- Böniger, U. and Tronicke, J.: Improving the interpretability of 3D GPR data using target-specific attributes: application to tomb detection, *Journal of Archaeological Science*, 37, 360–367, <https://doi.org/10.1016/j.jas.2009.09.049>, 2010.
- Chandler, D. M., Wadham, J. L., Lis, G. P., Cowton, T., Sole, A., Bartholomew, I., Telling, J., Nienow, P., Bagshaw, E. B., Mair, D., Vinen, S., and Hubbard, A.: Evolution of the subglacial drainage system beneath the Greenland Ice Sheet revealed by tracers, *Nature Geoscience*, 6, 195–198, <https://doi.org/10.1038/ngeo1737>, 2013.
- Church, G., Bauder, A., Grab, M., Rabenstein, L., Singh, S., and Maurer, H.: Detecting and characterising an englacial conduit network within a temperate Swiss glacier using active seismic, ground penetrating radar and borehole analysis, *Annals of Glaciology*, 60, 193–205, <https://doi.org/10.1017/aog.2019.19>, 2019.
- Church, G., Grab, M., Schmelzbach, C., Bauder, A., and Maurer, H.: Monitoring the seasonal changes of an englacial conduit network using repeated ground-penetrating radar measurements, *The Cryosphere*, 14, 3269–3286, <https://doi.org/10.5194/tc-14-3269-2020>, 2020.
- Colorado, J., Devia, C., Perez, M., Mondragon, I., Mendez, D., and Parra, C.: Low-altitude autonomous drone navigation for landmine detection purposes, 2017 International Conference on Unmanned Aircraft Systems, ICUAS 2017, pp. 540–546, <https://doi.org/10.1109/ICUAS.2017.7991303>, 2017.
- Cook, S. J. and Swift, D. A.: Subglacial basins: Their origin and importance in glacial systems and landscapes, *Earth-Science Reviews*, 115, 332–372, <https://doi.org/10.1016/j.earscirev.2012.09.009>, 2012.
- Cuffey, K. M. and Paterson, W. S. B.: *The Physics of Glaciers*, Fourth Edition, Academic Press, fourth edn., 2010.
- Egli, P. E., Irving, J., and Lane, S. N.: Characterization of subglacial marginal channels using 3-D analysis of high-density ground-penetrating radar data, *Journal of Glaciology*, pp. 1–14, <https://doi.org/10.1017/jog.2021.26>, 2021.
- Flowers, G. E. and Clarke, G. K. C.: Surface and bed topography of Trapridge Glacier, Yukon Territory, Canada: digital elevation models and derived hydraulic geometry, *Journal of Glaciology*, 45, 165–174, <https://doi.org/10.1017/S0022143000003142>, 1999.
- Fountain, A. G. and Walder, J. S.: Water flow through temperate glaciers, *Reviews of Geophysics*, 36, 299–328, <https://doi.org/10.1029/97RG03579>, 1998.
- Fountain, A. G., Jacobel, R. W., Schlichting, R., and Jansson, P.: Fractures as the main pathways of water flow in temperate glaciers, *Nature*, 433, 618–621, <https://doi.org/10.1038/nature03296>, 2005.

- Gaffey, C. and Bhardwaj, A.: Applications of Unmanned Aerial Vehicles in Cryosphere: Latest Advances and Prospects, *Remote Sensing*, 12, 948, <https://doi.org/10.3390/rs12060948>, 2020.
- 390 GLAMOS: The Swiss Glaciers 2013/14 and 2014/15, Bauder, A. (ed.), Glaciological Report No. 135/136 of the Cryospheric Commission (EKK) of the Swiss Academy of Sciences (SCNAT) published by VAW / ETH Zürich, Tech. rep., [https://doi.org/10.18752/glrep\\_135-136](https://doi.org/10.18752/glrep_135-136), 2017.
- Grab, M., Bauder, A., Ammann, F., Langhammer, L., Hellmann, S., Church, G. J., Schmid, L., Rabenstein, L., and Maurer, H. R.: Ice volume estimates of Swiss glaciers using helicopter-borne GPR an example from the Glacier de la Plaine Morte, in: 2018 17th International Conference on Ground Penetrating Radar (GPR), pp. 1–4, IEEE, <https://doi.org/10.1109/ICGPR.2018.8441613>, 2018.
- 395 Grab, M., Mattea, E., Bauder, A., Huss, M., Rabenstein, L., Hodel, E., Linsbauer, A., Langhammer, L., Schmid, L., Church, G., Hellmann, S., Déléze, K., Schaer, P., Lathion, P., Farinotti, D., and Maurer, H.: Ice thickness distribution of all Swiss glaciers based on extended ground-penetrating radar data and glaciological modeling, *Journal of Glaciology*, <https://doi.org/10.1017/jog.2021.55>, 2021.
- Grasmueck, M., Weger, R., and Horstmeyer, H.: Full-resolution 3D GPR imaging, *Geophysics*, 70, 12JF–Z26, <https://doi.org/10.1190/1.1852780>, 2005.
- 400 Gudmundsson, G. H., Bassi, A., Vonmoos, M., Bauder, A., Fischer, U. H., and Funk, M.: High-resolution measurements of spatial and temporal variations in surface velocities of Unteraargletscher, Bernese Alps, Switzerland, *Annals of Glaciology*, 31, 63–68, <https://doi.org/10.3189/172756400781820156>, 2000.
- Gulley, J.: Structural control of englacial conduits in the temperate Matanuska Glacier, Alaska, USA, *Journal of Glaciology*, 55, 681–690, <https://doi.org/10.3189/002214309789470860>, 2009.
- 405 Gulley, J. D., Benn, D. I., Müller, D., and Luckman, A.: A cut-and-closure origin for englacial conduits in uncrevassed regions of polythermal glaciers, *Journal of Glaciology*, 55, 66–80, <https://doi.org/10.3189/002214309788608930>, 2009.
- Hansen, L. U., Piotrowski, J. A., Benn, D. I., and Sevestre, H.: A cross-validated three-dimensional model of an englacial and subglacial drainage system in a High-Arctic glacier, *Journal of Glaciology*, pp. 1–13, <https://doi.org/10.1017/jog.2020.1>, 2020.
- 410 Harper, J. T., Bradford, J. H., Humphrey, N. F., and Meierbachtol, T. W.: Vertical extension of the subglacial drainage system into basal crevasses, *Nature*, 467, 579–582, <https://doi.org/10.1038/nature09398>, 2010.
- Hart, J. K., Rose, K. C., Clayton, A., and Martinez, K.: Englacial and subglacial water flow at Skálafellsjökull, Iceland derived from ground penetrating radar, in situ Glacsweb probe and borehole water level measurements, *Earth Surface Processes and Landforms*, 40, 2071–2083, <https://doi.org/10.1002/esp.3783>, 2015.
- 415 Hoffman, M. J., Andrews, L. C., Price, S. A., Catania, G. A., Neumann, T. A., Lüthi, M. P., Gulley, J., Ryser, C., Hawley, R. L., and Morriss, B.: Greenland subglacial drainage evolution regulated by weakly connected regions of the bed, *Nature Communications*, 7, <https://doi.org/10.1038/ncomms13903>, 2016.
- Hooke, R. L., Laumann, T., and Kohler, J.: Subglacial Water Pressures and the Shape of Subglacial Conduits, *Journal of Glaciology*, 36, 67–71, <https://doi.org/10.3189/S0022143000005566>, 1990.
- 420 Iken, A., Rothlisberger, H., Flotron, A., and Haeberli, W.: The uplift of Unteraargletscher at the beginning of the melt season - a consequence of water storage at the bed?, *Journal of Glaciology*, 29, 28–47, <https://doi.org/10.1017/S0022143000005128>, 1983.
- Irvine-Fynn, T. D. L., Moorman, B. J., Williams, J. L. M., and Walter, F. S. A.: Seasonal changes in ground-penetrating radar signature observed at a polythermal glacier, Bylot Island, Canada, *Earth Surface Processes and Landforms*, 31, 892–909, <https://doi.org/10.1002/esp.1299>, 2006.

- 425 Irving, J. D. and Knight, R. J.: Removal of wavelet dispersion from ground-penetrating radar data, *Geophysics*, 68, 960–970, <https://doi.org/10.1190/1.1581068>, 2003.
- Joughin, I., Das, S. B., King, M. A., Smith, B. E., and Howat, I. M.: Seasonal Speedup Along the Western Flank of the Greenland Ice Sheet, *Science*, 320, 781–783, <https://doi.org/10.1126/science.1153288>, 2008.
- King, E. C.: The precision of radar-derived subglacial bed topography: A case study from Pine Island Glacier, Antarctica, *Annals of Glaciology*, 61, 154–161, <https://doi.org/10.1017/aog.2020.33>, 2020.
- 430 Lindner, F., Walter, F., Laske, G., and Gimbert, F.: Glaciohydraulic seismic tremors on an Alpine glacier, *The Cryosphere*, 14, 287–308, <https://doi.org/10.5194/tc-14-287-2020>, 2019.
- Lliboutry, L.: Physical Processes in Temperate Glaciers, *Journal of Glaciology*, 16, 151–158, <https://doi.org/10.3189/S002214300003149X>, 1976.
- 435 Lliboutry, L.: Local Friction Laws for Glaciers: A Critical Review and New Openings, *Journal of Glaciology*, 23, 67–95, <https://doi.org/10.3189/s0022143000029750>, 1979.
- Lliboutry, L.: Modifications to the Theory of Intraglacial Waterways for the Case of Subglacial Ones, *Journal of Glaciology*, 29, 216–226, <https://doi.org/10.3189/S0022143000008273>, 1983.
- Macgregor, K. R., Riihimäki, C. A., and Anderson, R. S.: Spatial and temporal evolution of rapid basal sliding on Bench Glacier, Alaska, USA, *Journal of Glaciology*, 51, 49–63, <https://doi.org/10.3189/172756505781829485>, 2005.
- 440 Mair, D., Nienow, P., Sharp, M., Wohlleben, T., and Willis, I.: Influence of subglacial drainage system evolution on glacier surface motion: Haut Glacier d’Arolla, Switzerland, *Journal of Geophysical Research*, 107, 2175, <https://doi.org/10.1029/2001JB000514>, 2002.
- McClymont, A. F., Green, A. G., Streich, R., Horstmeyer, H., Tronicke, J., Nobes, D. C., Pettinga, J., Campbell, J., and Langridge, R.: Visualization of active faults using geometric attributes of 3D GPR data: An example from the Alpine Fault Zone, New Zealand, *Geophysics*, 73, <https://doi.org/10.1190/1.2825408>, 2008.
- 445 Moorman, B. J. and Michel, F. a.: Glacial hydrological system characterization using ground-penetrating radar, *Hydrological Processes*, 14, 2645–2667, [https://doi.org/10.1002/1099-1085\(20001030\)14:15<2645::AID-HYP84>3.0.CO;2-2](https://doi.org/10.1002/1099-1085(20001030)14:15<2645::AID-HYP84>3.0.CO;2-2), 2000.
- Nanni, U., Gimbert, F., Vincent, C., Gräff, D., Walter, F., Piard, L., and Moreau, L.: Quantification of seasonal and diurnal dynamics of subglacial channels using seismic observations on an Alpine glacier, *The Cryosphere*, 14, 1475–1496, <https://doi.org/10.5194/tc-14-1475-2020>, 2020.
- 450 Nienow, P., Sharp, M., and Willis, I.: Temporal Switching Between Englacial and Subglacial Drainage Pathways: Dye Tracer Evidence from the Haut Glacier D’arolla, Switzerland, *Geografiska Annaler: Series A, Physical Geography*, 78, 51–60, <https://doi.org/10.1080/04353676.1996.11880451>, 1996.
- Nienow, P., Sharp, M., and Willis, I.: Seasonal changes in the morphology of the subglacial drainage system, Haut Glacier d’Arolla, Switzerland, *Earth Surface Processes and Landforms*, 23, 825–843, [https://doi.org/10.1002/\(SICI\)1096-9837\(199809\)23:9<825::AID-ESP893>3.0.CO;2-2](https://doi.org/10.1002/(SICI)1096-9837(199809)23:9<825::AID-ESP893>3.0.CO;2-2), 1998.
- 455 Nye, J.: Glacier sliding without cavitation in a linear viscous approximation, 315, 381–403, <https://doi.org/10.1098/rspa.1970.0050>, 1970.
- Palmer, S. J., Dowdeswell, J. A., Christoffersen, P., Young, D. A., Blankenship, D. D., Greenbaum, J. S., Benham, T., Bamber, J., and Siegert, M. J.: Greenland subglacial lakes detected by radar, *Geophysical Research Letters*, 40, 6154–6159, <https://doi.org/10.1002/2013GL058383>, 2013.
- 460 Peters, L. E., Anandakrishnan, S., Holland, C. W., Horgan, H. J., Blankenship, D. D., and Voigt, D. E.: Seismic detection of a subglacial lake near the South Pole, Antarctica, *Geophysical Research Letters*, 35, 1–5, <https://doi.org/10.1029/2008GL035704>, 2008.

- Podolskiy, E. A. and Walter, F.: Cryoseismology, *Reviews of Geophysics*, pp. 708–758, <https://doi.org/10.1002/2016RG000526>, 2016.
- Rada, C. and Schoof, C.: Channelized, distributed, and disconnected: Subglacial drainage under a valley glacier in the Yukon, *The Cryosphere*, 12, 2609–2636, <https://doi.org/10.5194/tc-12-2609-2018>, 2018.
- Reynolds, J. M.: *An introduction to applied and environmental geophysics*, John Wiley & Sons, 1997.
- Ridley, J. K., Cudlip, W., and Laxon, S. W.: Identification of subglacial lakes using ERS-1 radar altimeter, *Journal of Glaciology*, 39, 625–634, <https://doi.org/10.1017/S002214300001652X>, 1993.
- Röthlisberger, H.: Water Pressure in Intra- and Subglacial Channels, *Journal of Glaciology*, 11, 177–203, <https://doi.org/10.1017/S0022143000022188>, 1972.
- Schaap, T., Roach, M. J., Peters, L. E., Cook, S., Kulessa, B., and Schoof, C.: Englacial drainage structures in an East Antarctic outlet glacier, *Journal of Glaciology*, 66, 166–174, <https://doi.org/10.1017/jog.2019.92>, 2019.
- Schoof, C.: Ice-sheet acceleration driven by melt supply variability, *Nature*, 468, 803–806, <https://doi.org/10.1038/nature09618>, 2010.
- Sheriff, R. E. and Geldart, L. P.: *Exploration Seismology*, Cambridge University Press, <https://doi.org/10.1017/CBO9781139168359>, 1995.
- Shreve, R. L.: Movement of Water in Glaciers, *Journal of Glaciology*, 11, 205–214, <https://doi.org/10.3189/S002214300002219X>, 1972.
- Siegert, M. J., Carter, S., Tabacco, I., Popov, S., and Blankenship, D. D.: A revised inventory of Antarctic subglacial lakes, *Antarctic Science*, 17, 453–460, <https://doi.org/10.1017/S0954102005002889>, 2005.
- Sipos, D., Planinsic, P., and Gleich, D.: On drone ground penetrating radar for landmine detection, in: 2017 First International Conference on Landmine: Detection, Clearance and Legislations (LDCL), pp. 1–4, IEEE, <https://doi.org/10.1109/LDCL.2017.7976931>, 2017.
- Stuart, G., Murray, T., Gamble, N., Hayes, K., and Hodson, A.: Characterization of englacial channels by ground-penetrating radar: An example from austre Brøggerbreen, Svalbard, *Journal of Geophysical Research*, 108, <https://doi.org/10.1029/2003JB002435>, 2003.
- Sugiyama, S. and Gudmundsson, G. H.: Short-term variations in glacier flow controlled by subglacial water pressure at Lauteraargletscher, Bernese Alps, Switzerland, *Journal of Glaciology*, 50, 353–362, <https://doi.org/10.3189/172756504781829846>, 2004.
- Sugiyama, S., Tsutaki, S., Nishimura, D., Blatter, H., Bauder, A., and Funk, M.: Hot water drilling and glaciological observations at the terminal part of Rhonegletscher, Switzerland in 2007, *Bulletin of Glaciological Research*, 26, 41–47, 2008.
- Temminghoff, M., Benn, D. I., Gulley, J. D., and Sevestre, H.: Characterization of the englacial and subglacial drainage system in a high Arctic cold glacier by speleological mapping and ground-penetrating radar, *Geografiska Annaler, Series A: Physical Geography*, 101, 98–117, <https://doi.org/10.1080/04353676.2018.1545120>, 2019.
- Tsutaki, S., Sugiyama, S., Nishimura, D., and Funk, M.: Acceleration and flotation of a glacier terminus during formation of a proglacial lake in Rhonegletscher, Switzerland, *Journal of Glaciology*, 59, 559–570, <https://doi.org/10.3189/2013JoG12J107>, 2013.
- Tuckett, P. A., Ely, J. C., Sole, A. J., Livingstone, S. J., Davison, B. J., Melchior van Wessem, J., and Howard, J.: Rapid accelerations of Antarctic Peninsula outlet glaciers driven by surface melt, *Nature Communications*, 10, <https://doi.org/10.1038/s41467-019-12039-2>, 2019.
- Werder, M. A., Bauder, A., Funk, M., and Keusen, H.-R.: Hazard assessment investigations in connection with the formation of a lake on the tongue of Unterer Grindelwaldgletscher, Bernese Alps, Switzerland, *Natural Hazards and Earth System Science*, 10, 227–237, <https://doi.org/10.5194/nhess-10-227-2010>, 2010.
- Wu, K., Rodriguez, G. A., Zajc, M., Jacquemin, E., Clément, M., De Coster, A., and Lambot, S.: A new drone-borne GPR for soil moisture mapping, *Remote Sensing of Environment*, 235, 111 456, <https://doi.org/10.1016/j.rse.2019.111456>, 2019.
- Zechmann, J. M., Booth, A. D., Truffer, M., Gusmeroli, A., Amundson, J. M., and Larsen, C. F.: Active seismic studies in valley glacier settings: Strategies and limitations, *Journal of Glaciology*, 64, 796–810, <https://doi.org/10.1017/jog.2018.69>, 2018.

Zwally, H. J., Abdalati, W., Herring, T., Larson, K., Saba, J., and Steffen, K.: Surface melt-induced acceleration of Greenland ice-sheet flow, *Science*, 297, 218–222, <https://doi.org/10.1126/science.1072708>, 2002.
